# Supplementary material for: Progressively exploring and assessing the prognosis of bladder urothelial cancer based on the microenvironment through the integration of multiple databases
Source: Frontiers journal article supplement (doi:10.3389/fmolb.2025.1702311), 2025-11-19

## 伦理证明

贵州医科大学附属医院泌尿外科邹雄撰写的文章  
《**Progressively exploring and assessing the prognosis of bladder urothelial cancer based on the microenvironment through the integration of multiple databases**》经医学伦理委员会审核，认为改  
论文内容不涉及患者隐私及商业利益，符合伦理相关法律法规要求，  
同意投稿。

贵州医科大学附属医院医学伦理委员会

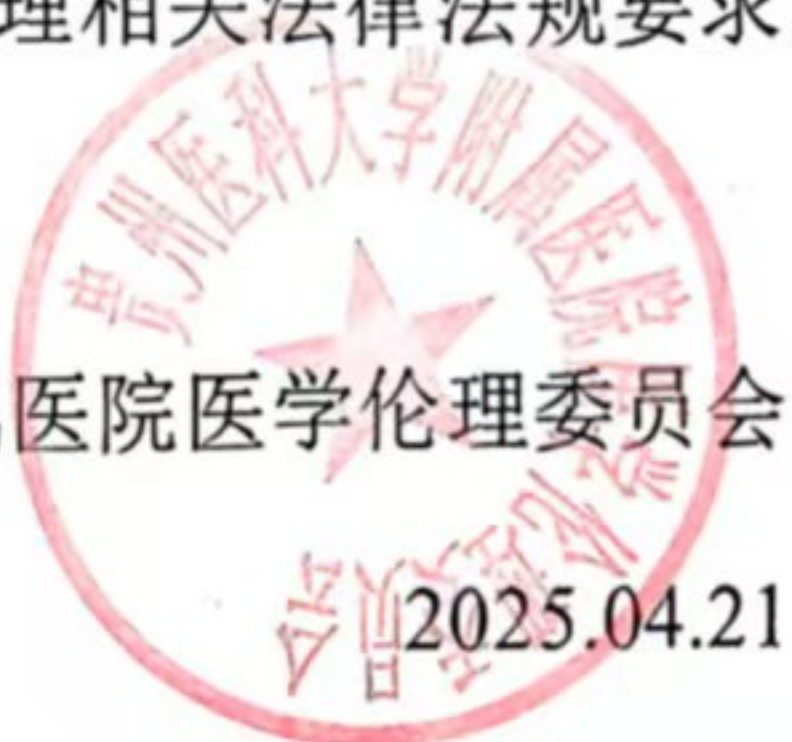

Supplement: Data_Sheet_1.zip [file Ethics approval.pdf › all raw data/Ethics approval.pdf]
