# Supplementary material for: Progressively exploring and assessing the prognosis of bladder urothelial cancer based on the microenvironment through the integration of multiple databases
Source: Frontiers journal article supplement (doi:10.3389/fmolb.2025.1702311), 2025-11-19

|          | pvalue | Hazard ratio       |
|----------|--------|--------------------|
| PSMB9    | 0.010  | 0.993(0.987–0.998) |
| CD3D     | 0.010  | 0.976(0.958–0.994) |
| MMP9     | 0.009  | 1.000(1.000–1.000) |
| BTN3A3   | 0.008  | 0.940(0.898–0.984) |
| APOL3    | 0.007  | 0.961(0.933–0.989) |
| IRF1     | 0.005  | 0.980(0.966–0.994) |
| EMP3     | 0.002  | 1.007(1.002–1.011) |
| SULF2    | 0.002  | 1.006(1.002–1.009) |
| CXCL12   | 0.004  | 1.012(1.004–1.020) |
| HLA-F    | 0.004  | 0.991(0.986–0.997) |
| COL6A2   | 0.008  | 1.001(1.000–1.002) |
| RTP4     | <0.001 | 0.964(0.945–0.984) |
| LGALS9   | 0.004  | 0.983(0.972–0.995) |
| GFPT2    | <0.001 | 1.028(1.014–1.042) |
| APOL6    | 0.007  | 0.972(0.952–0.992) |
| NELL2    | 0.002  | 1.025(1.009–1.041) |
| BTN3A1   | 0.002  | 0.945(0.912–0.979) |
| ADCY7    | <0.001 | 1.238(1.115–1.376) |
| ETV7     | 0.004  | 0.964(0.941–0.988) |
| APOBEC3G | <0.001 | 0.946(0.917–0.976) |
| SH2D2A   | 0.002  | 0.911(0.859–0.966) |
| ATP8B2   | 0.004  | 1.029(1.009–1.049) |
| ITGB7    | <0.001 | 0.632(0.489–0.818) |
| CTLA4    | 0.006  | 0.886(0.812–0.967) |
| TCIRG1   | 0.007  | 0.986(0.977–0.996) |
| ANPEP    | <0.001 | 1.006(1.002–1.009) |
| SEMA4D   | 0.002  | 0.844(0.757–0.941) |
| ZSCAN16  | <0.001 | 0.928(0.888–0.969) |
| SLC1A6   | <0.001 | 1.018(1.008–1.028) |
| CBR4     | 0.003  | 0.905(0.846–0.968) |
| TBX3     | 0.003  | 0.992(0.987–0.997) |
| NPAS2    | 0.006  | 0.937(0.895–0.981) |
| ACP6     | 0.005  | 0.921(0.870–0.976) |
| CHMP4C   | 0.004  | 0.973(0.955–0.991) |
| PLEKHA6  | 0.006  | 0.960(0.933–0.988) |
| UPK3A    | 0.003  | 1.001(1.000–1.002) |
| ZNF823   | 0.002  | 0.936(0.897–0.976) |
| MAOA     | 0.009  | 0.992(0.986–0.998) |
| REEP6    | 0.004  | 1.005(1.002–1.009) |
| LIMCH1   | 0.009  | 0.957(0.925–0.989) |
| KRT23    | <0.001 | 1.002(1.001–1.003) |
| FOXA1    | 0.002  | 0.986(0.978–0.995) |
| ID1      | 0.003  | 0.999(0.998–1.000) |
| BTBD16   | 0.005  | 0.990(0.983–0.997) |
| VSIG2    | 0.010  | 0.998(0.996–0.999) |
| CYP4B1   | 0.009  | 0.997(0.995–0.999) |
| HSD17B2  | 0.009  | 0.971(0.950–0.993) |

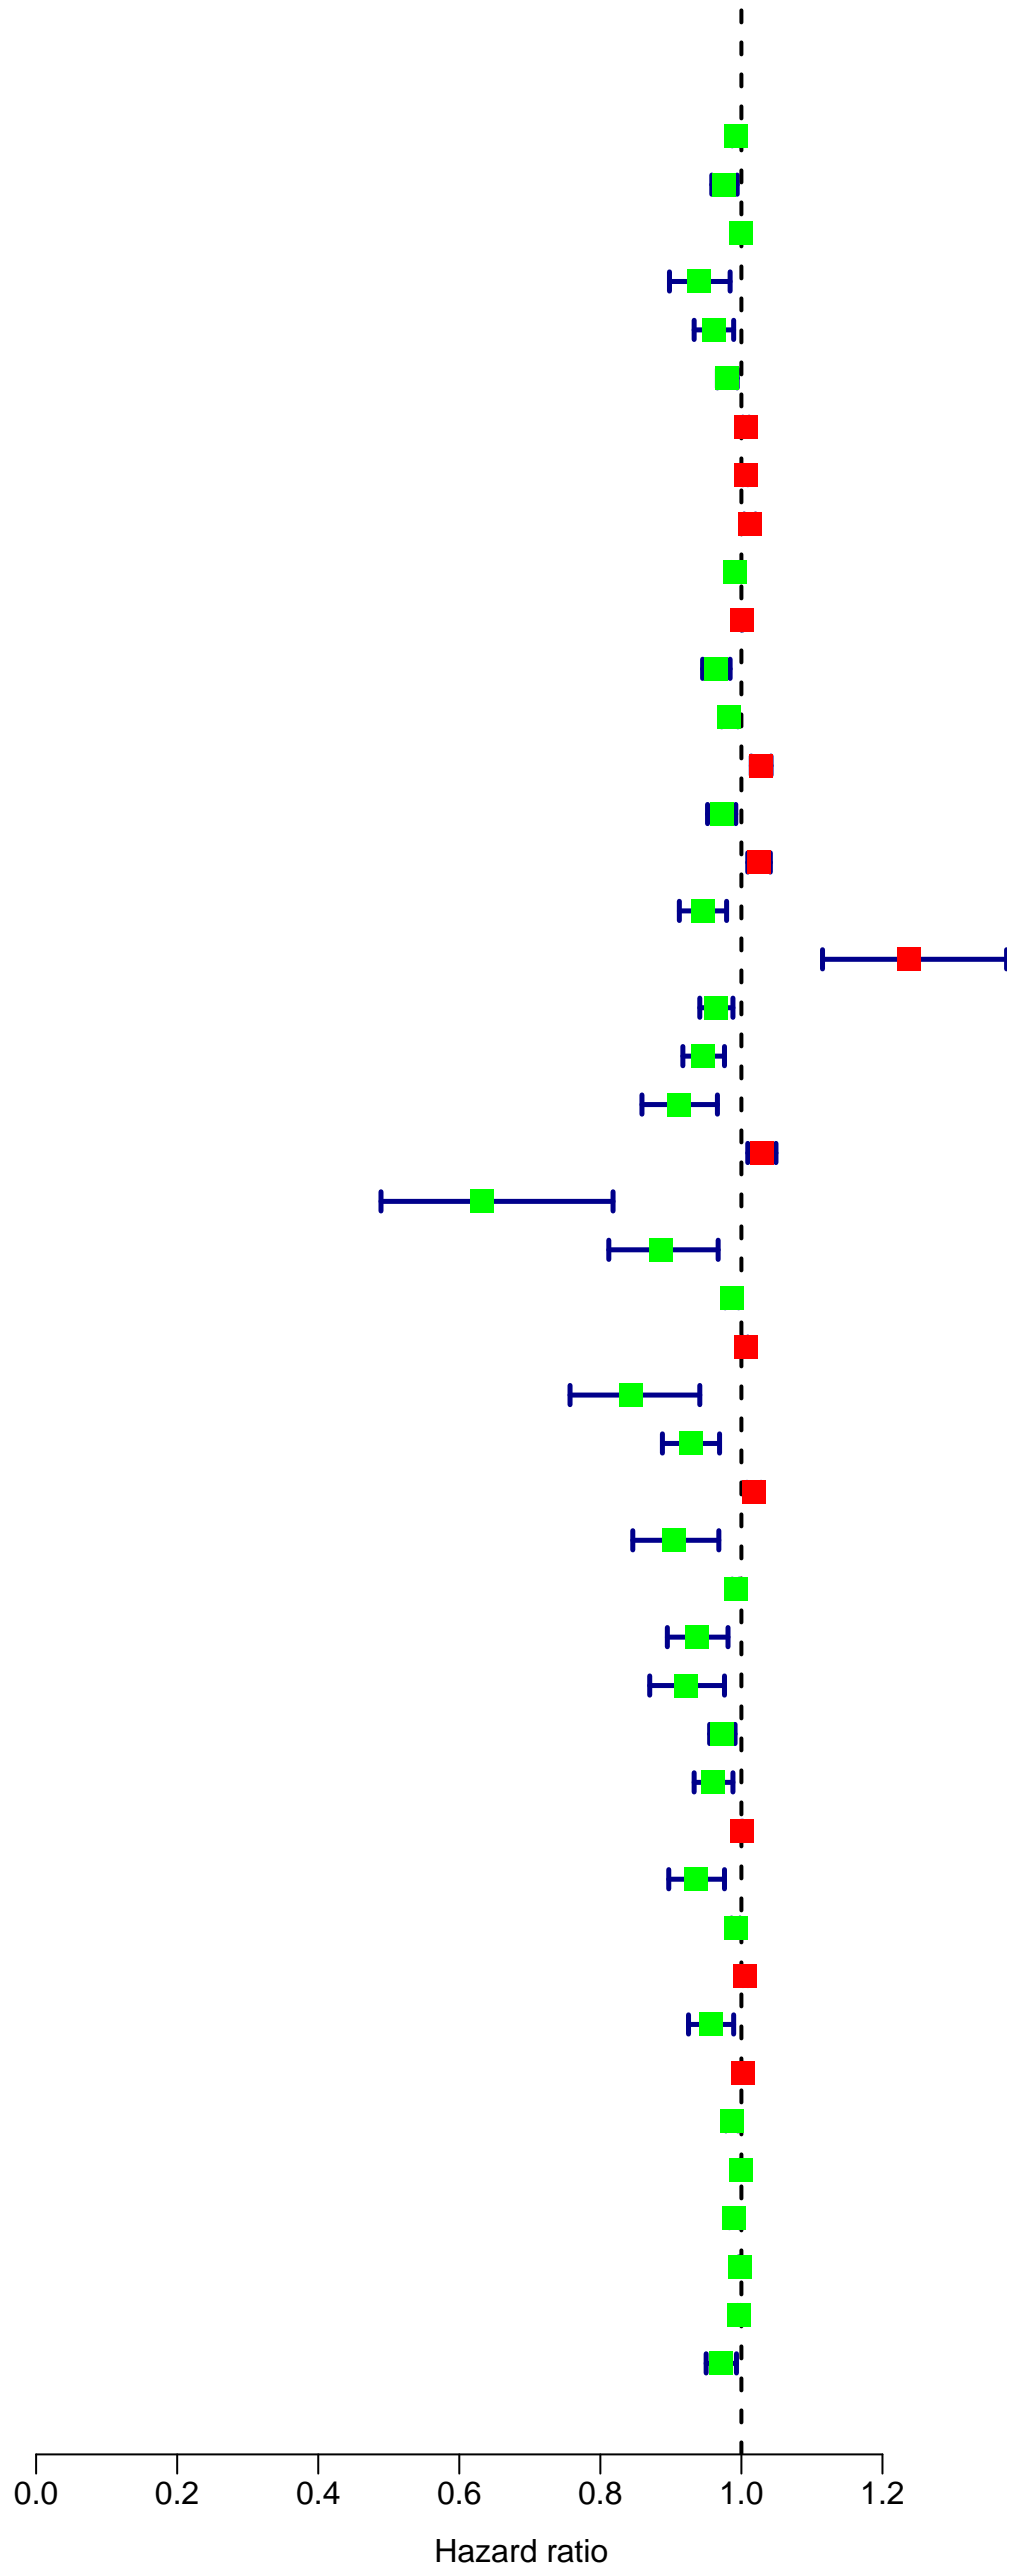

Supplement: Data_Sheet_1.zip [file Figure 4A.pdf › all raw data/Figures/Figure 4/Figure 4A.pdf]
