# Supplementary material for: Progressively exploring and assessing the prognosis of bladder urothelial cancer based on the microenvironment through the integration of multiple databases
Source: Frontiers journal article supplement (doi:10.3389/fmolb.2025.1702311), 2025-11-19
Supplement: Data_Sheet_1.zip [file raw data of qPCR.xlsx]

## Sheet: Sheet1
Sample Name	Gene Name	Cq	Cq Mean	△Ct=Ct(gene of interest)-Ct(GAPDH)	2-△Ct	average value of 2-△Ct	2-△△Ct
N1	ADCY7	26.93		6.15667	0.0140171	0.0124358	1.12715	1.07576
N1	ADCY7	27.19		6.41667	0.0117055		0.941273
N1	ADCY7	26.89		6.11667	0.0144112		1.15884
N2	ADCY7	26.35		5.53667	0.0215426		1.7323	1.82571
N2	ADCY7	26.16		5.34667	0.024575		1.97614
N2	ADCY7	26.32		5.50667	0.0219952		1.76869
N3	ADCY7	27.89		7.09667	0.00730618		0.58751	0.629361
N3	ADCY7	27.68		6.88667	0.00845097		0.679566
N3	ADCY7	27.81		7.01667	0.00772277		0.621009
N4	ADCY7	27.0244		9.60333	0.00128561		0.103379	0.469172
N4	ADCY7	25.6		7.07667	0.00740817		0.595711
N4	ADCY7	25.35		6.82667	0.00880985		0.708424
T1	ADCY7	24.75		4.44667	0.0458585		3.68761	3.7773
T1	ADCY7	24.63		4.32667	0.049836		4.00745
T1	ADCY7	24.77		4.46667	0.0452272		3.63684
T2	ADCY7	26.82		5.18	0.0275845		2.21814	1.89614
T2	ADCY7	27.22		5.58	0.0209051		1.68104
T2	ADCY7	27.13		5.49	0.0222508		1.78925
T3	ADCY7	21.25		4.04667	0.0605107		4.86583	4.3603
T3	ADCY7	21.33		4.12667	0.0572466		4.60335
T3	ADCY7	21.68		4.47667	0.0449148		3.61172
T4	ADCY7	25.08		3.77	0.0733022		5.89443	4.92232
T4	ADCY7	25.67		4.36	0.0486978		3.91592
T4	ADCY7	25.33		4.02	0.0616395		4.9566
N1	CTLA4	31.72		10.9467	0.00050667	0.000881376	0.574862	0.653867
N1	CTLA4	31.58		10.8067	0.000558302		0.633443
N1	CTLA4	31.33		10.5567	0.000663937		0.753295
N2	CTLA4	31.93		11.1167	0.00045035		0.510962	0.876052
N2	CTLA4	30.93		10.1167	0.000900699		1.02192
N2	CTLA4	30.83		10.0167	0.000965346		1.09527
N3	CTLA4	30.04		9.24667	0.00164617		1.86773	1.74922
N3	CTLA4	30.14		9.34667	0.00153594		1.74266
N3	CTLA4	30.23		9.43667	0.00144305		1.63726
N4	CTLA4	30.97		9.9663	0.000999645		1.13419	0.720863
N4	CTLA4	29.98		11.4567	0.000355795		0.403681
N4	CTLA4	29.35		10.8267	0.000550616		0.624723
T1	CTLA4	30.88		10.5767	0.000654796		0.742925	0.86843
T1	CTLA4	30.69		10.3867	0.000746968		0.847501
T1	CTLA4	30.43		10.1267	0.000894478		1.01486
T2	CTLA4	29.15		7.51	0.00548611		6.22448	3.61289
T2	CTLA4	30.68		9.04	0.00189972		2.1554
T2	CTLA4	30.49		8.85	0.00216713		2.4588
T3	CTLA4	30.31		13.1067	0.000113371		0.128629	0.147908
T3	CTLA4	30.53		13.3267	9.7336e-05		0.110436
T3	CTLA4	29.64		12.4367	0.000180381		0.204658
T4	CTLA4	29.65		8.34	0.0030861		3.50145	3.38084
T4	CTLA4	29.83		8.52	0.00272411		3.09074
T4	CTLA4	29.63		8.32	0.00312918		3.55033
N1	GAPDH	20.58	20.7733
N1	GAPDH	20.94
N1	GAPDH	20.8
N2	GAPDH	20.48	20.8133
N2	GAPDH	21.08
N2	GAPDH	20.88
N3	GAPDH	21.09	20.7933
N3	GAPDH	20.65
N3	GAPDH	20.64
N4	GAPDH	18.75	18.5233
N4	GAPDH	18.53
N4	GAPDH	18.29
T1	GAPDH	21.62	20.3033
T1	GAPDH	19.75
T1	GAPDH	19.54
T2	GAPDH	21.7	21.64
T2	GAPDH	21.49
T2	GAPDH	21.73
T3	GAPDH	17.27	17.2033
T3	GAPDH	17.09
T3	GAPDH	17.25
T4	GAPDH	21.38	21.31
T4	GAPDH	20.31
T4	GAPDH	22.24
N1	ITGB7	29.42		8.64667	0.00249513	0.0030419	0.820255	0.608238
N1	ITGB7	29.99		9.21667	0.00168076		0.552538
N1	ITGB7	30.28		9.50667	0.0013747		0.451922
N2	ITGB7	29.28		8.46667	0.0028267		0.929254	0.747458
N2	ITGB7	29.63		8.81667	0.00221778		0.729078
N2	ITGB7	29.95		9.13667	0.0017766		0.584042
N3	ITGB7	29.05		8.25667	0.00326961		1.07486	0.829603
N3	ITGB7	29.49		8.69667	0.00241014		0.792315
N3	ITGB7	29.84		9.04667	0.00189096		0.621637
N4	ITGB7	25.31		6.78667	0.00905753		2.97759	1.8147
N4	ITGB7	26.16		7.63667	0.00502498		1.65192
N4	ITGB7	27.18		8.65667	0.0024779		0.81459
T1	ITGB7	28.01		7.70667	0.00478699		1.57368	1.19535
T1	ITGB7	28.31		8.00667	0.00388824		1.27823
T1	ITGB7	29.11		8.80667	0.00223321		0.734149
T2	ITGB7	31.2		9.56	0.00132481		0.43552	0.570692
T2	ITGB7	33.17		11.53	0.000338161		0.111168
T2	ITGB7	29.78		8.14	0.003545		1.16539
T3	ITGB7	27.95		10.7467	0.000582011		0.191331	0.141134
T3	ITGB7	28.24		11.0367	0.000476028		0.15649
T3	ITGB7	29.29		12.0867	0.000229906		0.0755798
T4	ITGB7	28.78		7.47	0.00564035		1.85422	0.833307
T4	ITGB7	31.21		9.9	0.00104665		0.344079
T4	ITGB7	31.4		10.09	0.000917503		0.301622
N1	NELL2	26.23		5.45667	0.0227709	0.0222998	1.02112	0.980135
N1	NELL2	26.45		5.67667	0.0195503		0.876701
N1	NELL2	26.2		5.42667	0.0232493		1.04258
N2	NELL2	26.42		5.60667	0.0205223		0.920288	0.860553
N2	NELL2	26.65		5.83667	0.017498		0.78467
N2	NELL2	26.49		5.67667	0.0195503		0.876701
N3	NELL2	25.58		4.78667	0.0362301		1.62468	2.03734
N3	NELL2	25.16		4.36667	0.0484733		2.17371
N3	NELL2	25.07		4.27667	0.0515935		2.31363
N4	NELL2	27.04		8.51667	0.00273041		0.122441	0.121973
N4	NELL2	27.12		8.59667	0.00258313		0.115836
N4	NELL2	26.98		8.45667	0.00284636		0.12764
T1	NELL2	26.48		6.17667	0.0138241		0.619922	0.640729
T1	NELL2	26.36		6.05667	0.0150232		0.67369
T1	NELL2	26.46		6.15667	0.0140171		0.628575
T2	NELL2	27.58		5.94	0.0162885		0.730433	0.703609
T2	NELL2	27.45		5.81	0.0178244		0.799308
T2	NELL2	27.91		6.27	0.0129581		0.581086
T3	NELL2	26.32		9.11667	0.0018014		0.0807809	0.0635826
T3	NELL2	27		9.79667	0.00112437		0.0504206
T3	NELL2	26.76		9.55667	0.00132787		0.0595464
T4	NELL2	26.9244		5.61444	0.0204119		0.91534	0.757355
T4	NELL2	27.12		5.81	0.0178244		0.799308
T4	NELL2	27.64		6.33	0.0124303		0.557415
N1	SLC1A6	30.64		9.86667	0.00107112	0.000774001	1.38387	0.964628
N1	SLC1A6	31.65		10.8767	0.00053186		0.687156
N1	SLC1A6	31.39		10.6167	0.000636891		0.822855
N2	SLC1A6	31.12		10.3067	0.000789558		1.0201	1.12152
N2	SLC1A6	30.96		10.1467	0.000882163		1.13974
N2	SLC1A6	30.88		10.0667	0.000932463		1.20473
N3	SLC1A6	31.09		10.2967	0.00079505		1.0272	1.12895
N3	SLC1A6	31.15		10.3567	0.000762663		0.985352
N3	SLC1A6	30.67		9.87667	0.00106372		1.37431
N4	SLC1A6	29.59		11.07	0.000465155		0.600975	0.784894
N4	SLC1A6	29.12		10.5967	0.000645781		0.834342
N4	SLC1A6	28.98		10.4567	0.00071159		0.919365
T1	SLC1A6	28.67		8.36667	0.00302958		3.91418	3.6698
T1	SLC1A6	29.02		8.71667	0.00237696		3.071
T1	SLC1A6	28.63		8.32667	0.00311475		4.02422
T2	SLC1A6	28.32		6.68	0.00975258		12.6002	11.671
T2	SLC1A6	28.54		6.9	0.00837323		10.8181
T2	SLC1A6	28.44		6.8	0.00897421		11.5946
T3	SLC1A6	26.86		8.65667	0.0024779		3.20142	3.10053
T3	SLC1A6	25.95		8.74667	0.00232804		3.0078
T3	SLC1A6	25.91		8.70667	0.00239349		3.09236
T4	SLC1A6	25.12		4.81	0.0356489		46.0579	38.7898
T4	SLC1A6	26.54		5.23	0.0266448		34.4248
T4	SLC1A6	26.48		5.17	0.0277763		35.8867
N1	ZNF823	28.3		7.52667	0.0054231	0.00490006	1.10674	0.87718
N1	ZNF823	28.12		7.34667	0.00614374		1.25381
N1	ZNF823	30.33		9.55667	0.00132787		0.270991
N2	ZNF823	28.75		7.93667	0.00408155		0.832959	1.44575
N2	ZNF823	27.77		6.95667	0.00805072		1.64298
N2	ZNF823	27.59		6.77667	0.00912053		1.86131
N3	ZNF823	27.96		7.16667	0.00696015		1.42042	1.28766
N3	ZNF823	28.62		7.82667	0.00440493		0.898952
N3	ZNF823	27.84		7.04667	0.00756383		1.54362
N4	ZNF823	27.69		9.16667	0.00174004		0.355105	0.389407
N4	ZNF823	27.52		8.99667	0.00195764		0.399514
N4	ZNF823	27.47		8.94667	0.00202668		0.413602
T1	ZNF823	26.08		5.77667	0.0182411		3.72262	4.29439
T1	ZNF823	25.5		5.19667	0.0272676		5.56475
T1	ZNF823	26.13		5.82667	0.0176197		3.59581
T2	ZNF823	25.44		3.8	0.0717936		14.6516	15.1778
T2	ZNF823	25.41		3.77	0.0733022		14.9594
T2	ZNF823	25.32		3.68	0.0780207		15.9224
T3	ZNF823	23.12		5.91667	0.0165541		3.37835	2.88733
T3	ZNF823	23.45		6.24667	0.0131694		2.6876
T3	ZNF823	23.5		6.29667	0.0127208		2.59605
T4	ZNF823	24.28		2.97	0.127627		26.0459	26.0192
T4	ZNF823	24.14		2.83	0.140632		28.7001
T4	ZNF823	24.44		3.13	0.114229		23.3117
