# Supplementary figures and images for: Progressively exploring and assessing the prognosis of bladder urothelial cancer based on the microenvironment through the integration of multiple databases
Source: Frontiers journal article supplement (doi:10.3389/fmolb.2025.1702311), 2025-11-19

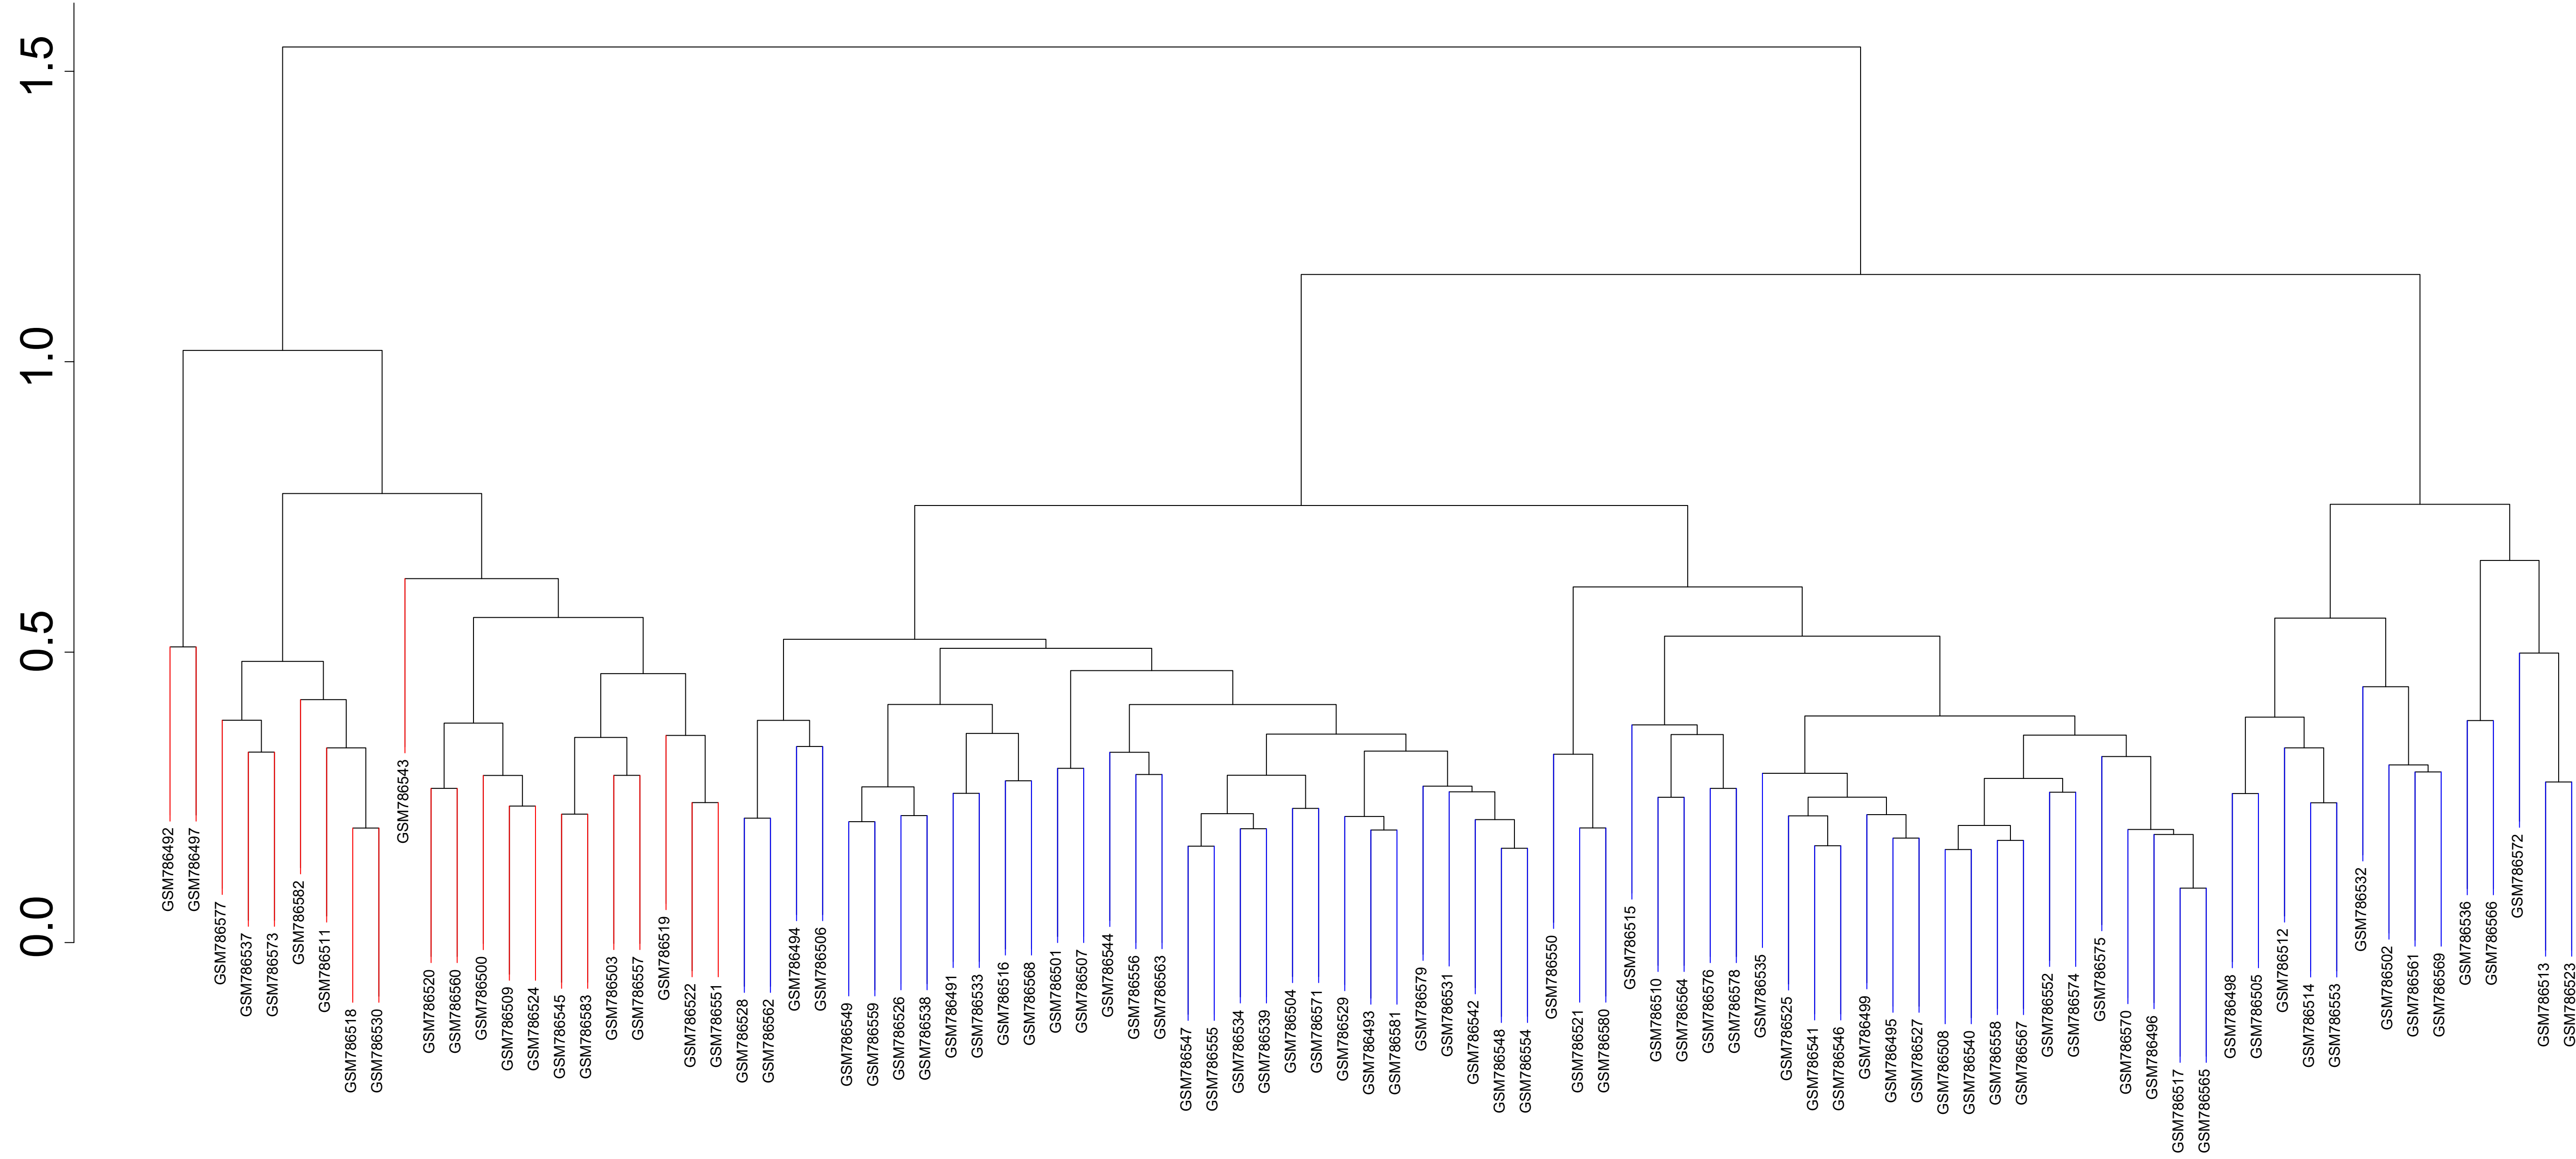

Supplement: Data_Sheet_1.zip [file Figure 1A.pdf › all raw data/Figures/Figure 1/Figure 1A.pdf]

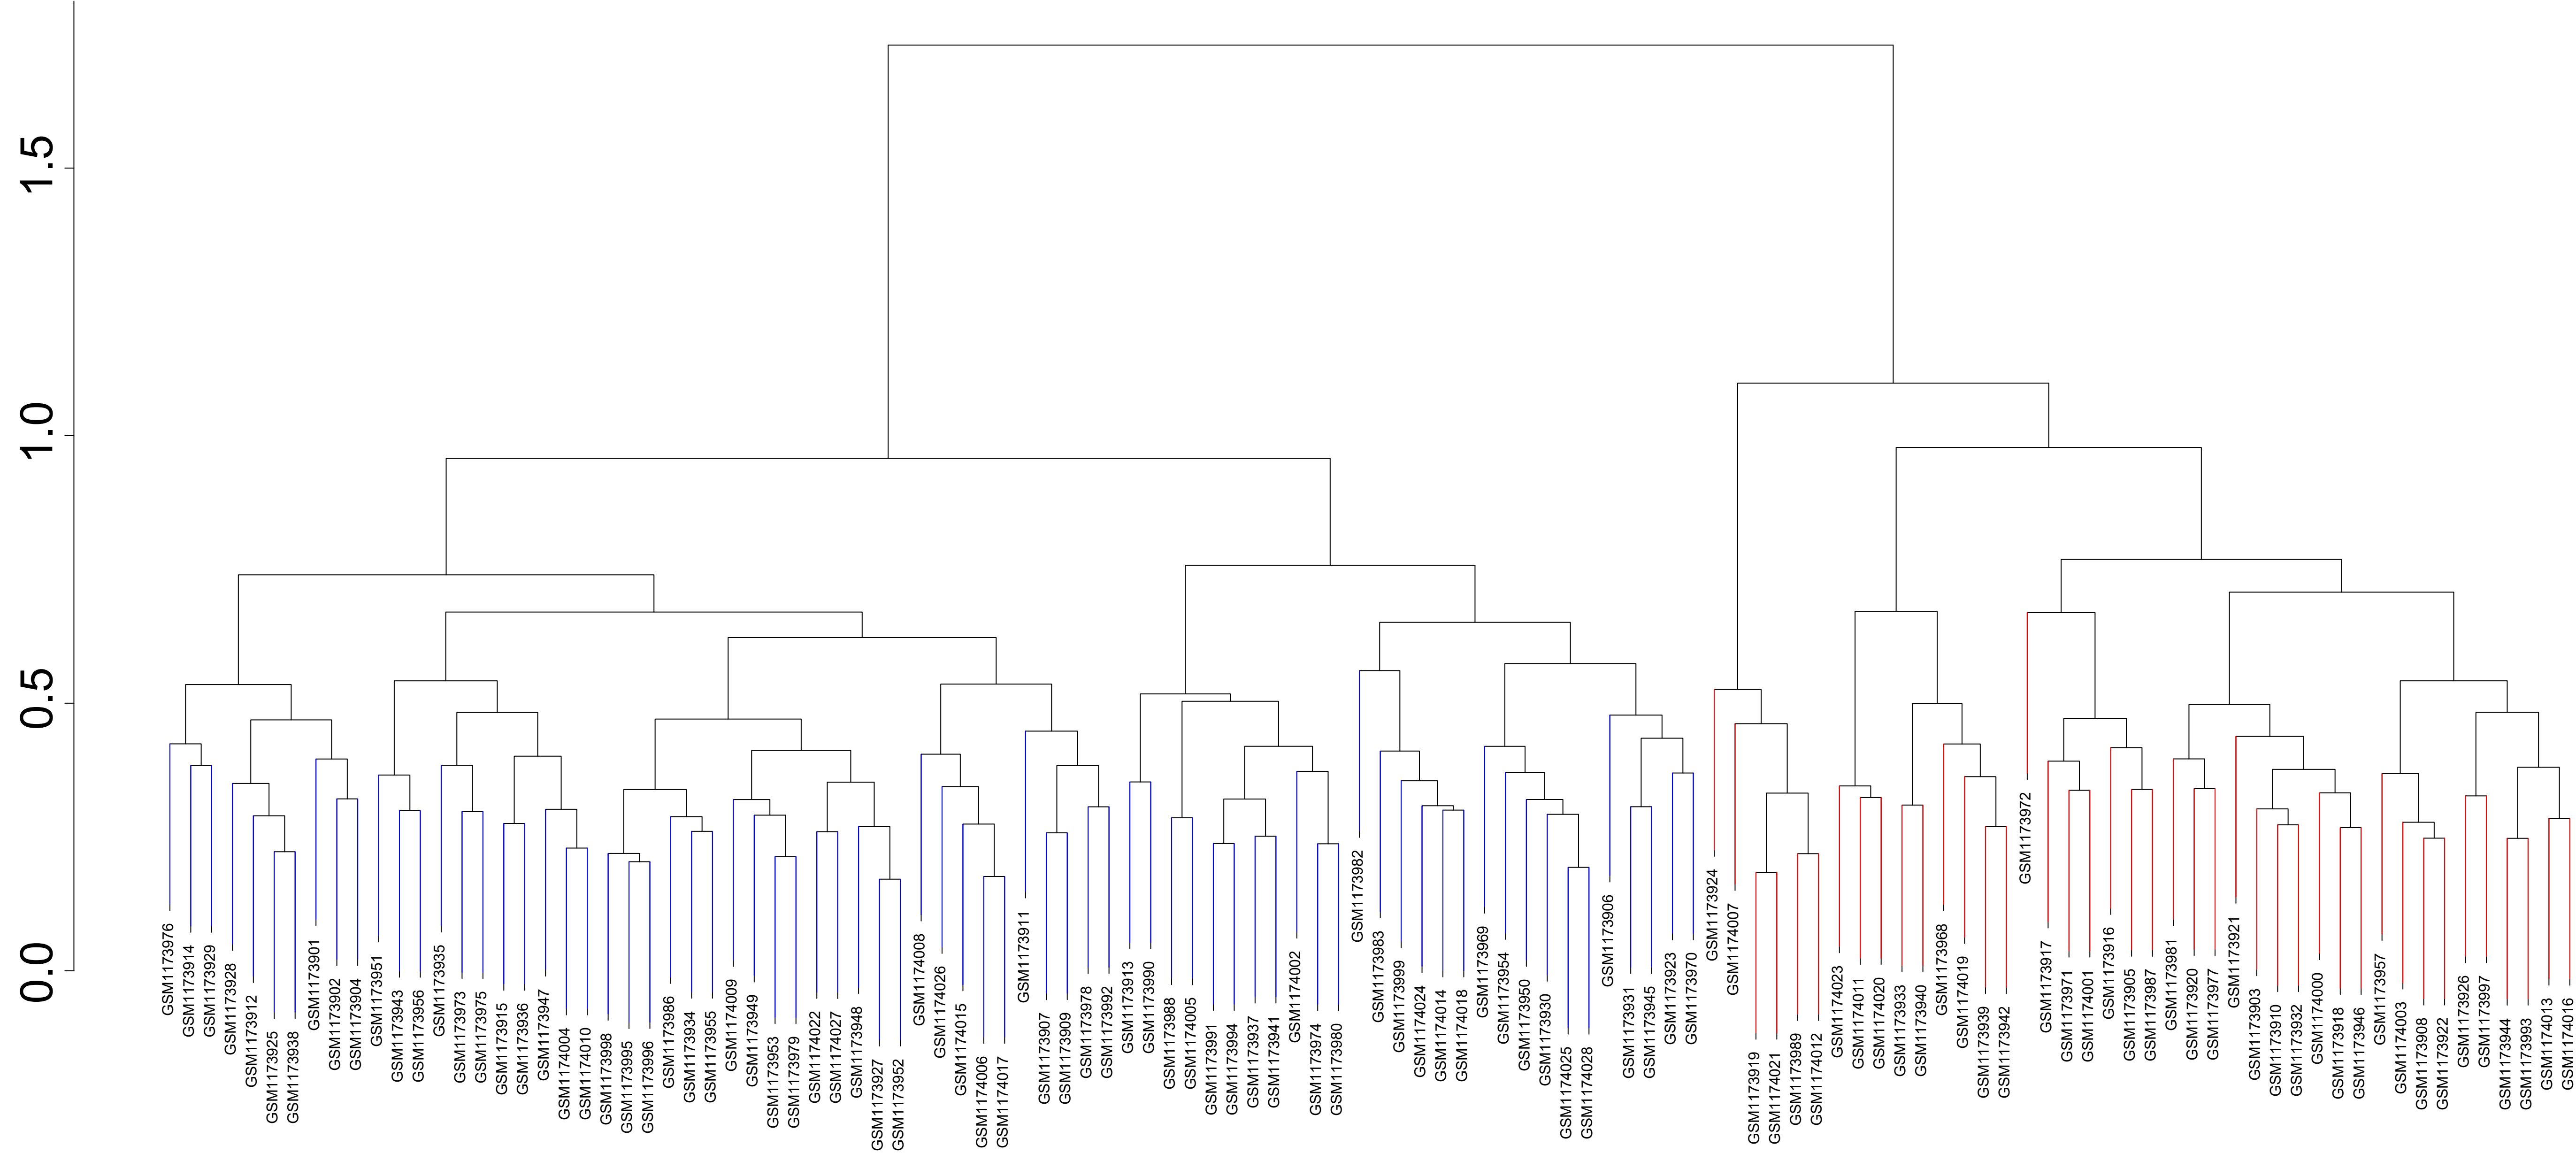

Supplement: Data_Sheet_1.zip [file Figure 1B.pdf › all raw data/Figures/Figure 1/Figure 1B.pdf]

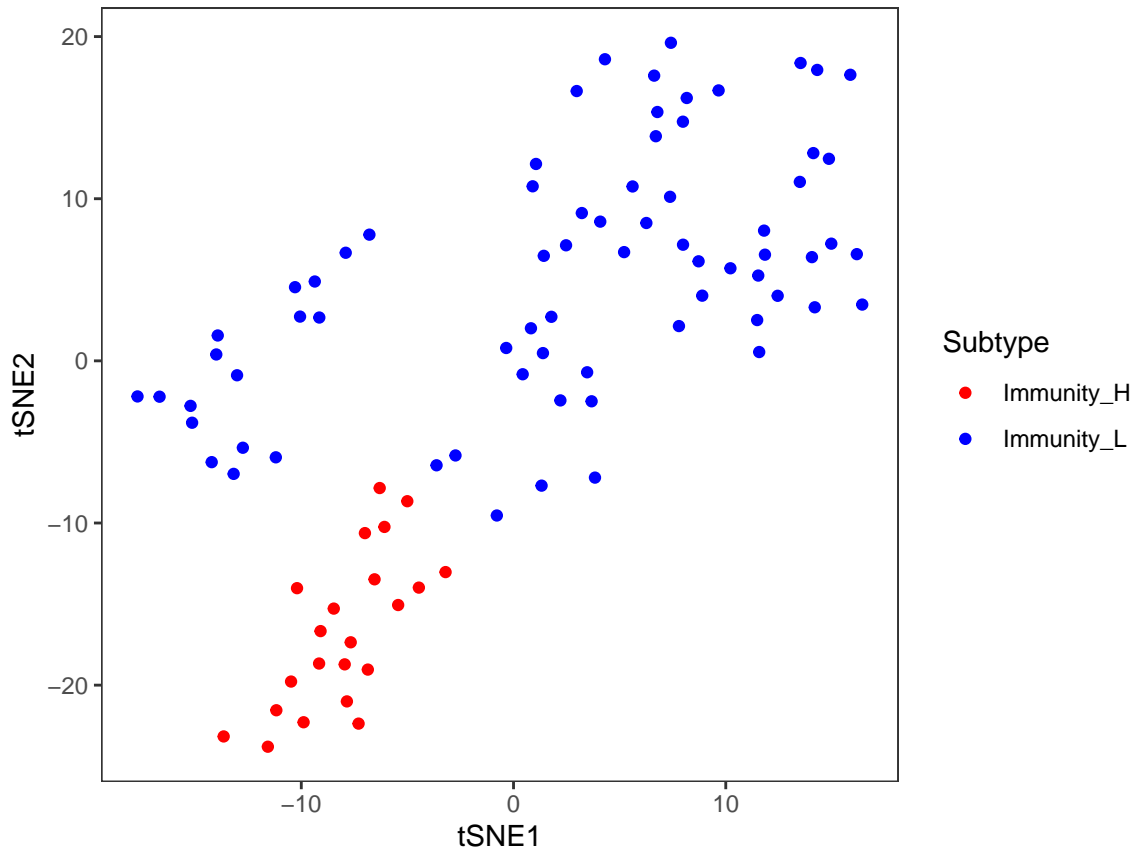

Supplement: Data_Sheet_1.zip [file Figure 1C.pdf › all raw data/Figures/Figure 1/Figure 1C.pdf]

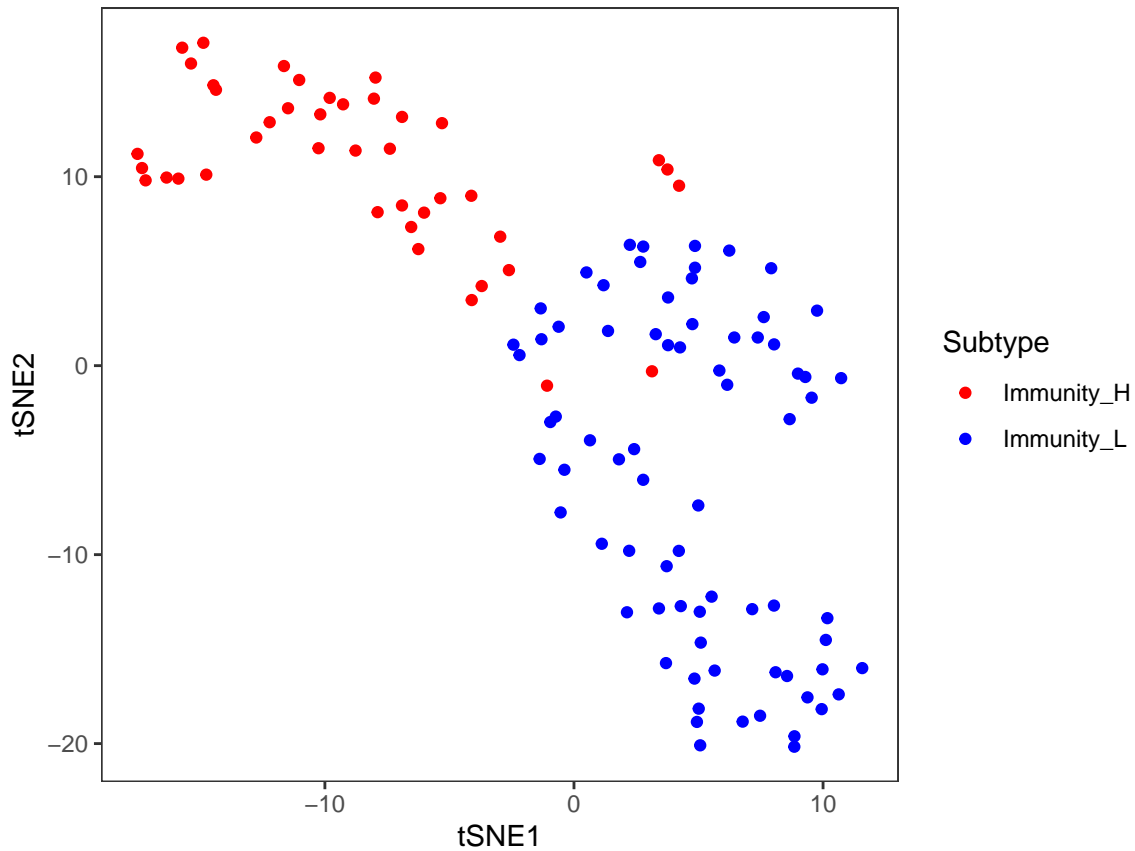

Supplement: Data_Sheet_1.zip [file Figure 1D.pdf › all raw data/Figures/Figure 1/Figure 1D.pdf]

Subtype  Immunity\_L  Immunity\_H

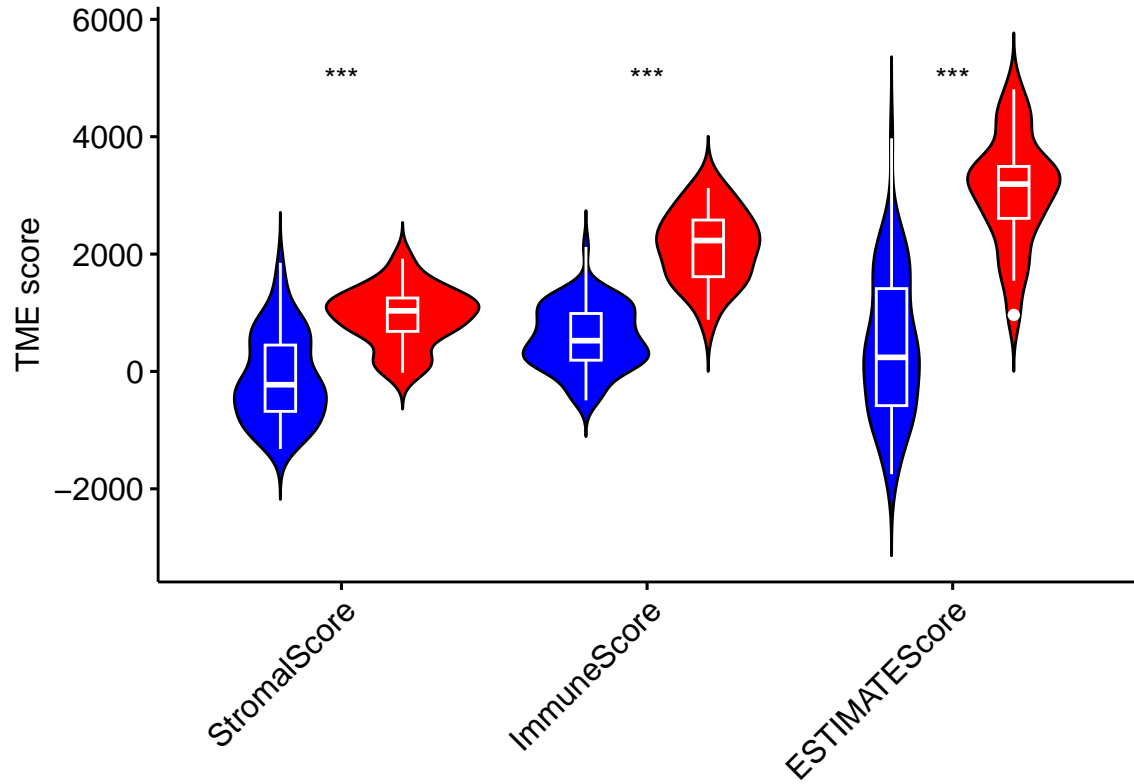

Supplement: Data_Sheet_1.zip [file Figure 2A.pdf › all raw data/Figures/Figure 2/Figure 2A.pdf]

Subtype

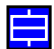

Immunity\_L

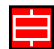

Immunity\_H

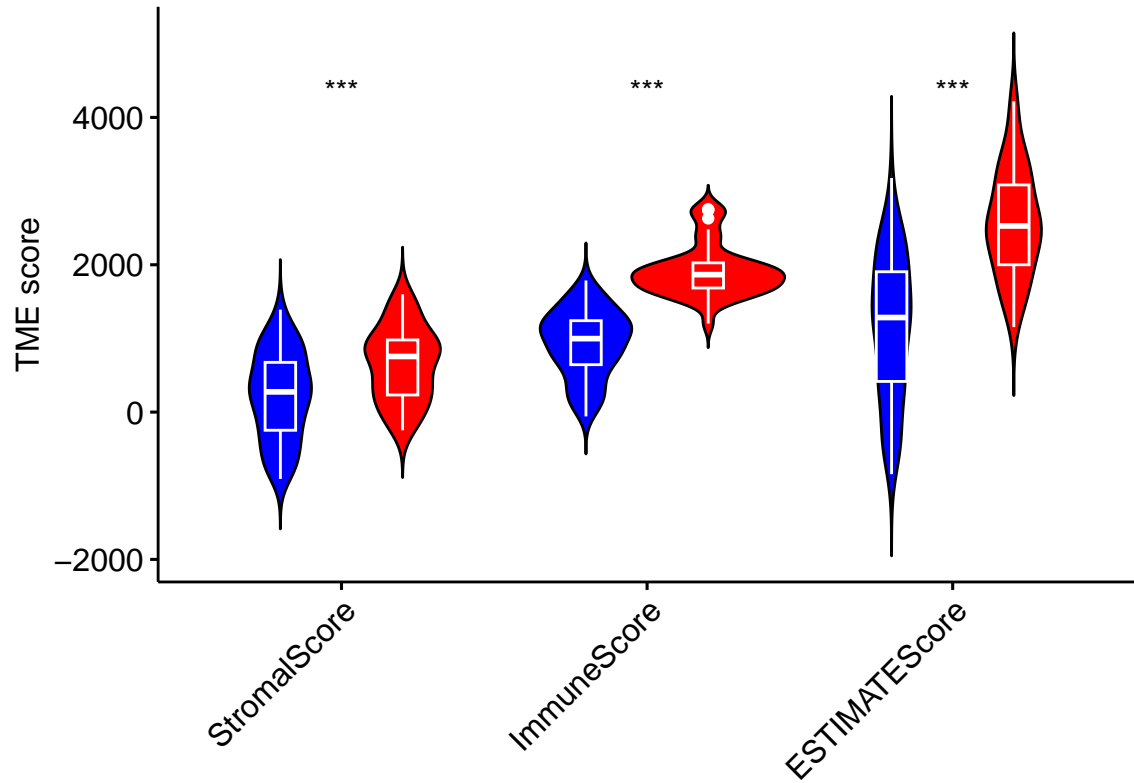

Supplement: Data_Sheet_1.zip [file Figure 2B.pdf › all raw data/Figures/Figure 2/Figure 2B.pdf]

Subtype Immunity\_L Immunity\_H

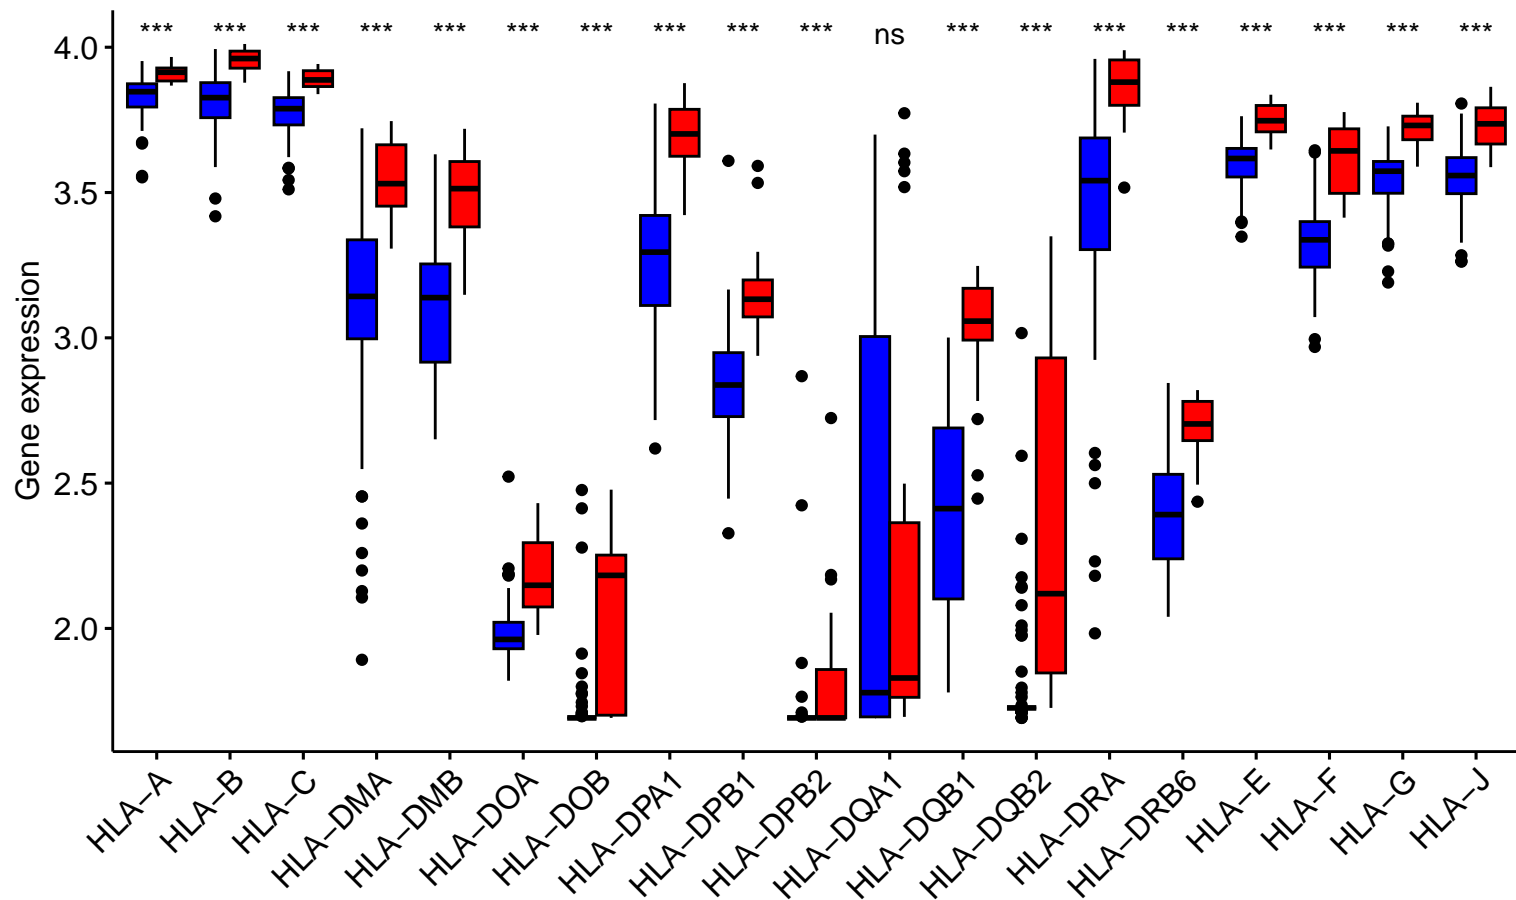

Supplement: Data_Sheet_1.zip [file Figure 2C.pdf › all raw data/Figures/Figure 2/Figure 2C.pdf]

Subtype Immunity\_L Immunity\_H

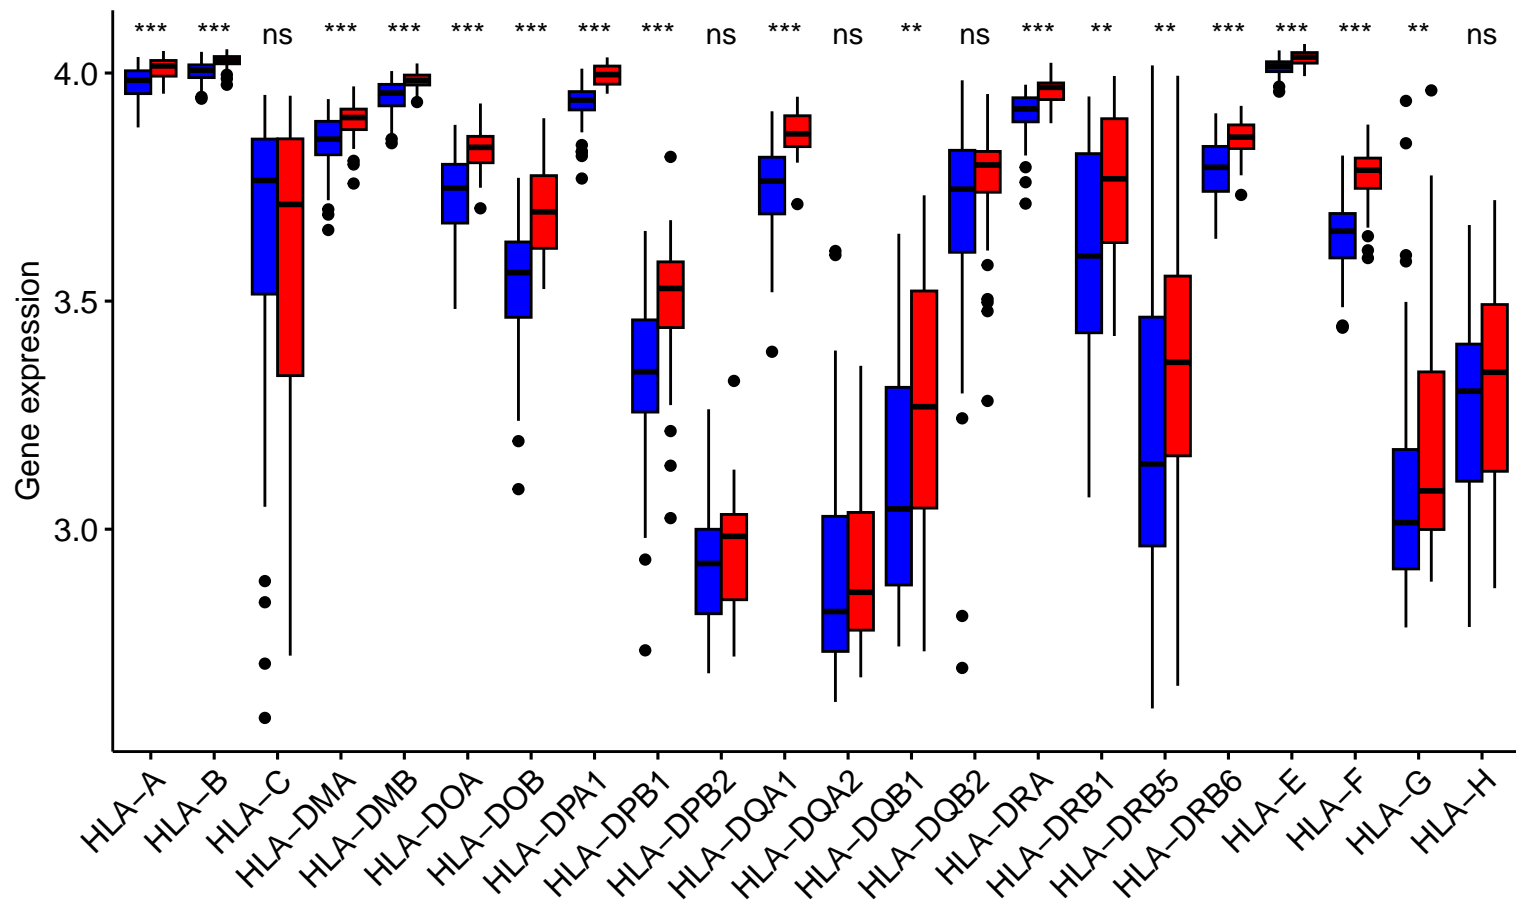

Supplement: Data_Sheet_1.zip [file Figure 2D.pdf › all raw data/Figures/Figure 2/Figure 2D.pdf]

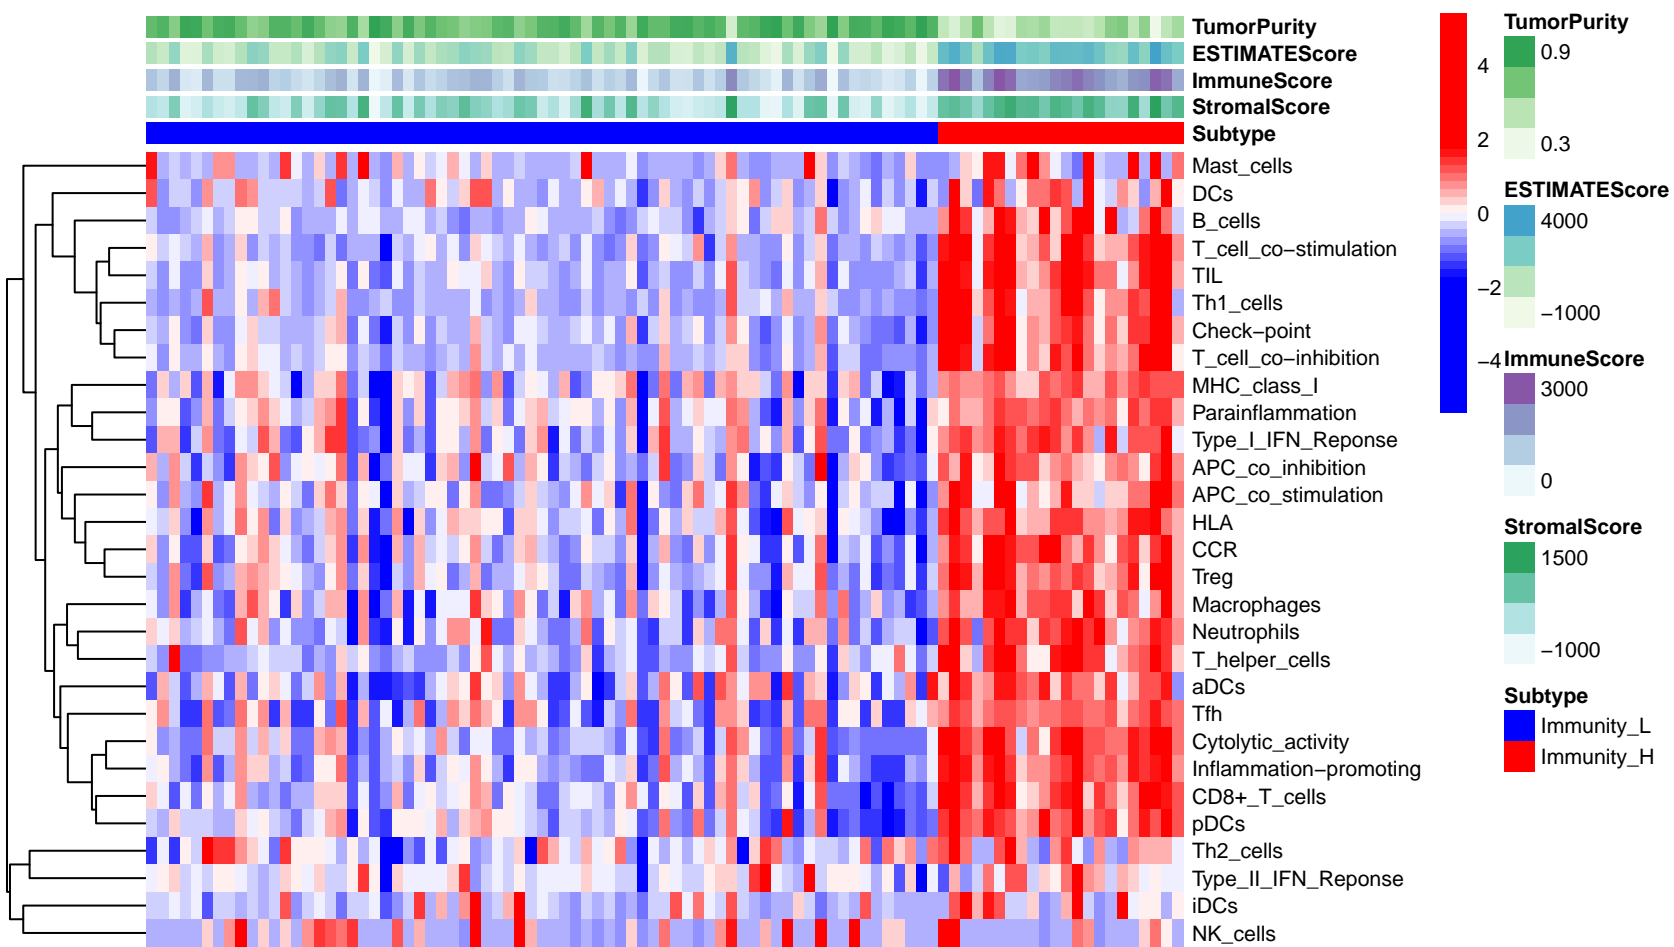

Supplement: Data_Sheet_1.zip [file Figure 2E.pdf › all raw data/Figures/Figure 2/Figure 2E.pdf]

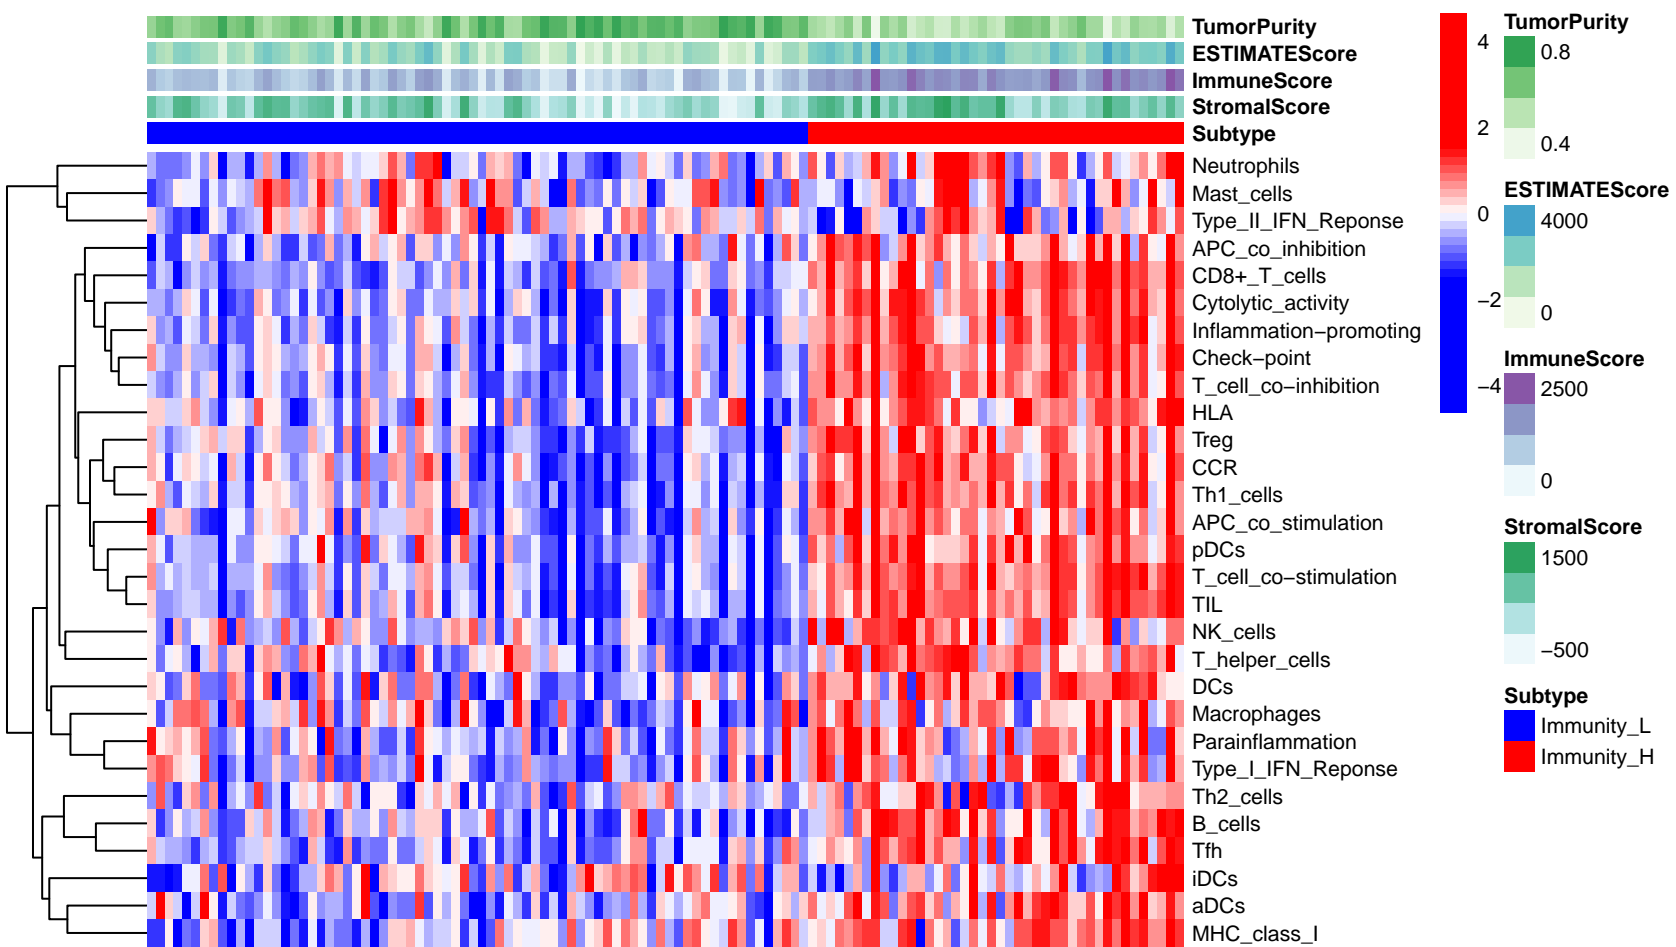

Supplement: Data_Sheet_1.zip [file Figure 2F.pdf › all raw data/Figures/Figure 2/Figure 2F.pdf]

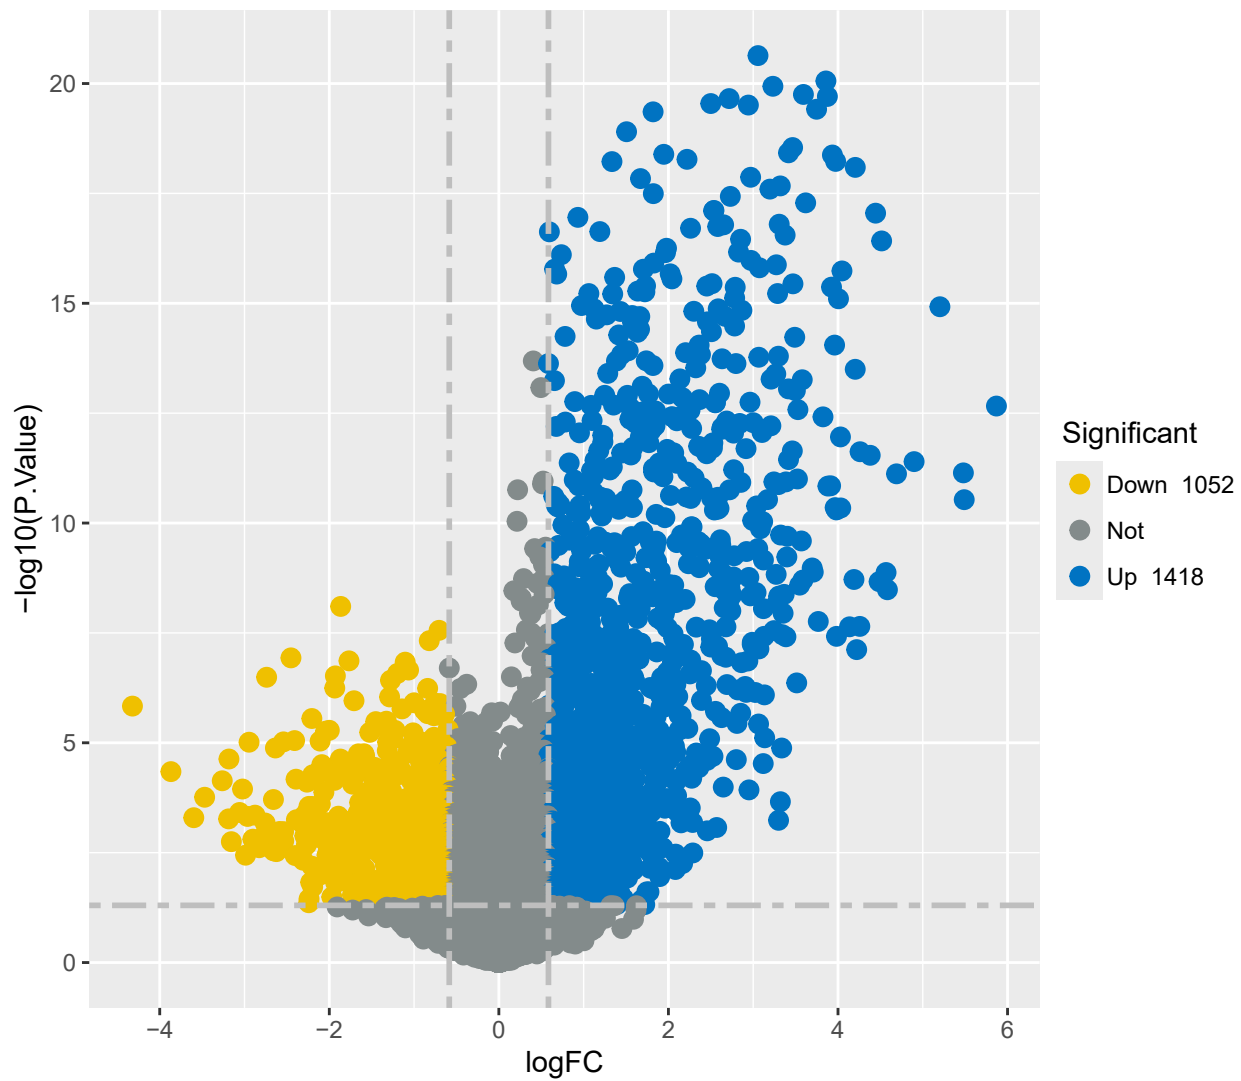

Supplement: Data_Sheet_1.zip [file Figure 3A.pdf › all raw data/Figures/Figure 3/Figure 3A.pdf]

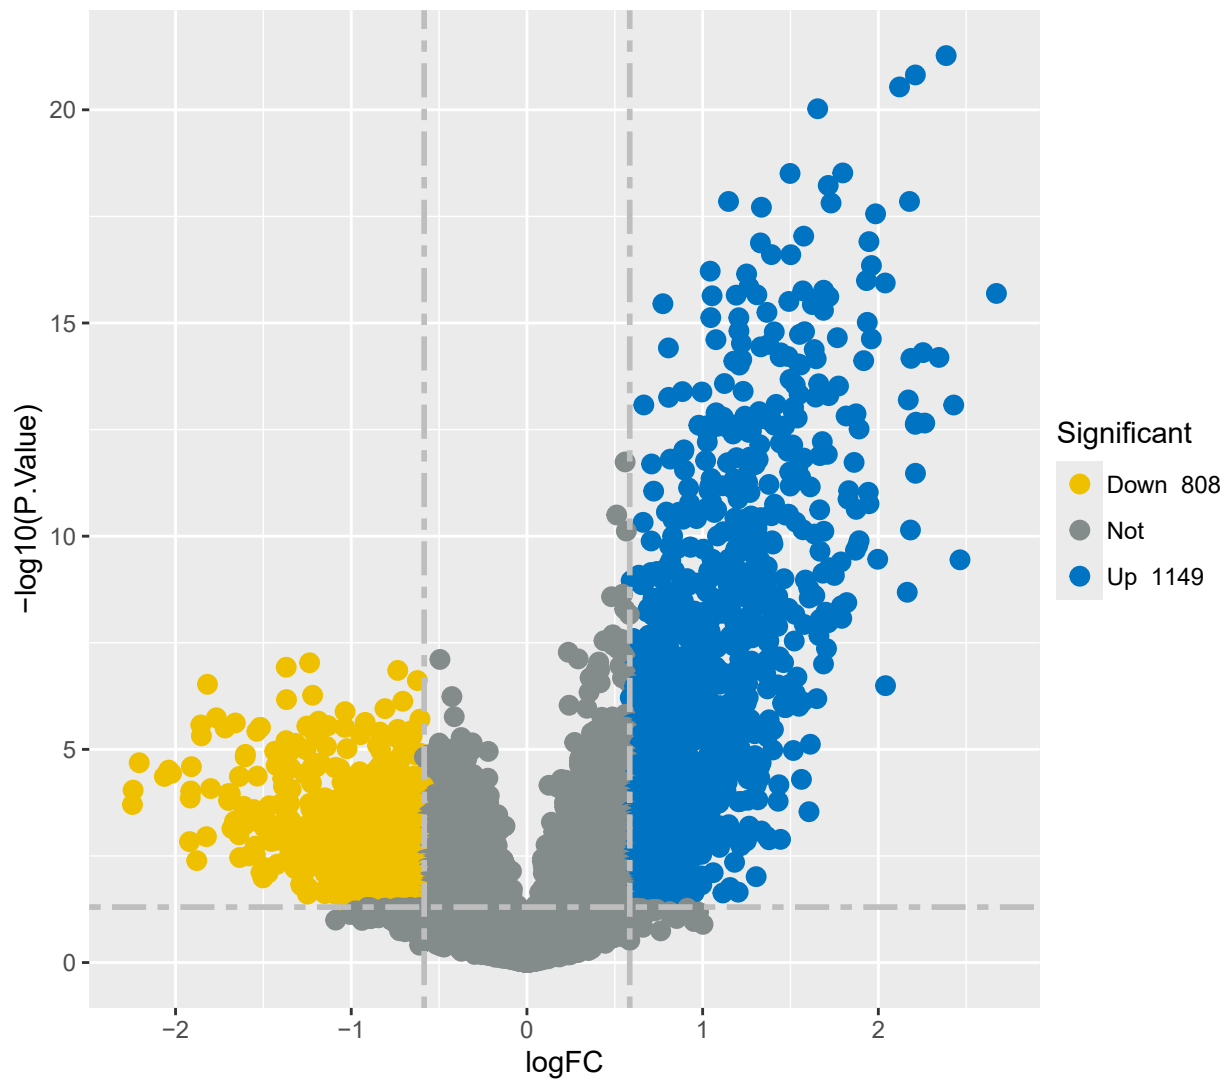

Supplement: Data_Sheet_1.zip [file Figure 3B.pdf › all raw data/Figures/Figure 3/Figure 3B.pdf]

GSE31684\_UP

GSE48276\_UP

**945**

**473**

**676**

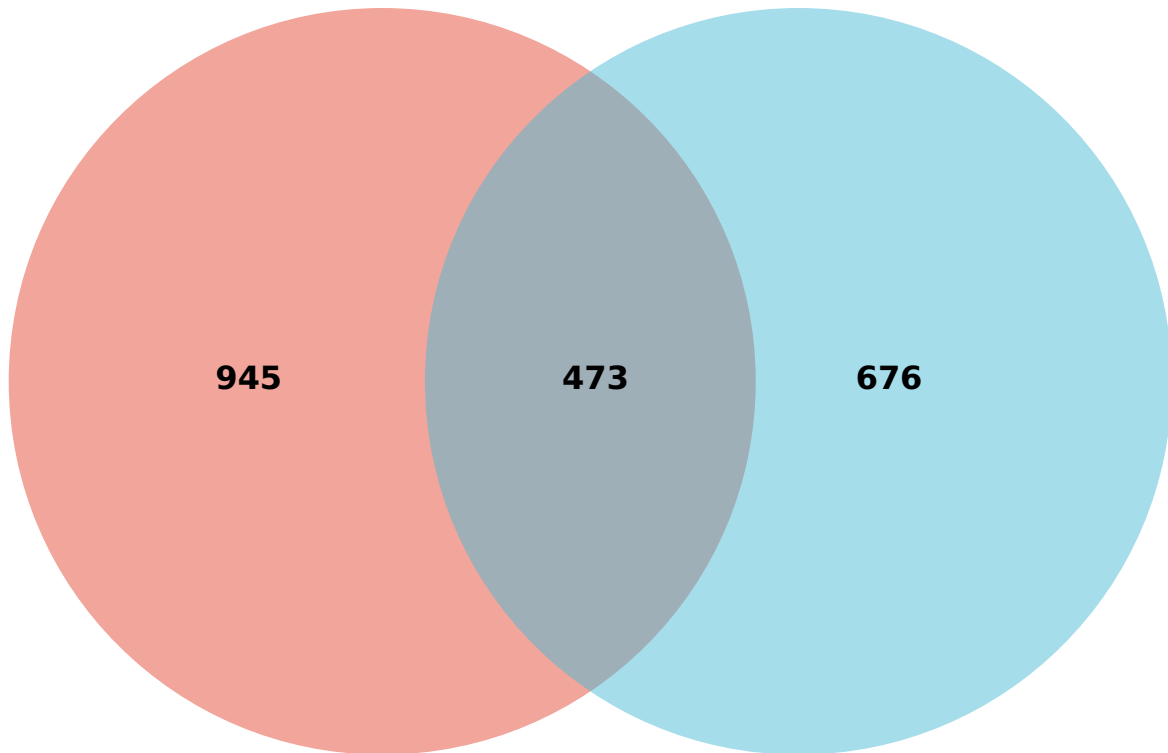

Supplement: Data_Sheet_1.zip [file Figure 3C.pdf › all raw data/Figures/Figure 3/Figure 3C.pdf]

GSE31684\_DOWN

GSE48276\_DOWN

**805**

**247**

**561**

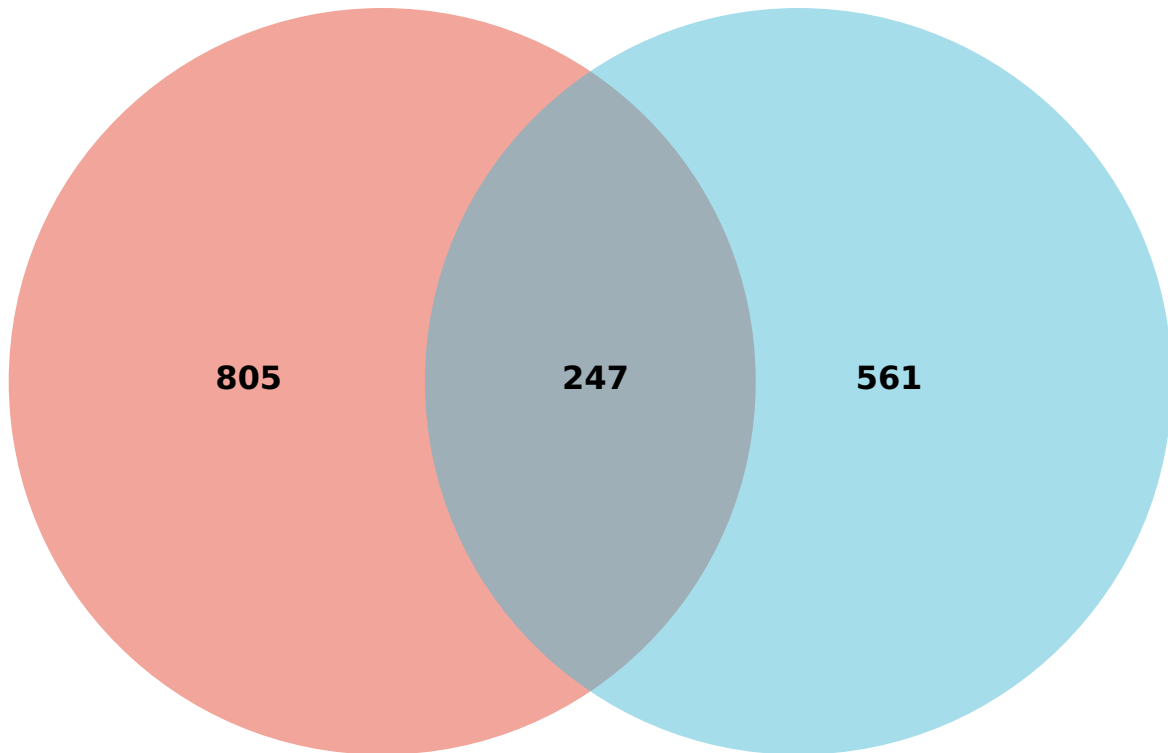

Supplement: Data_Sheet_1.zip [file Figure 3D.pdf › all raw data/Figures/Figure 3/Figure 3D.pdf]

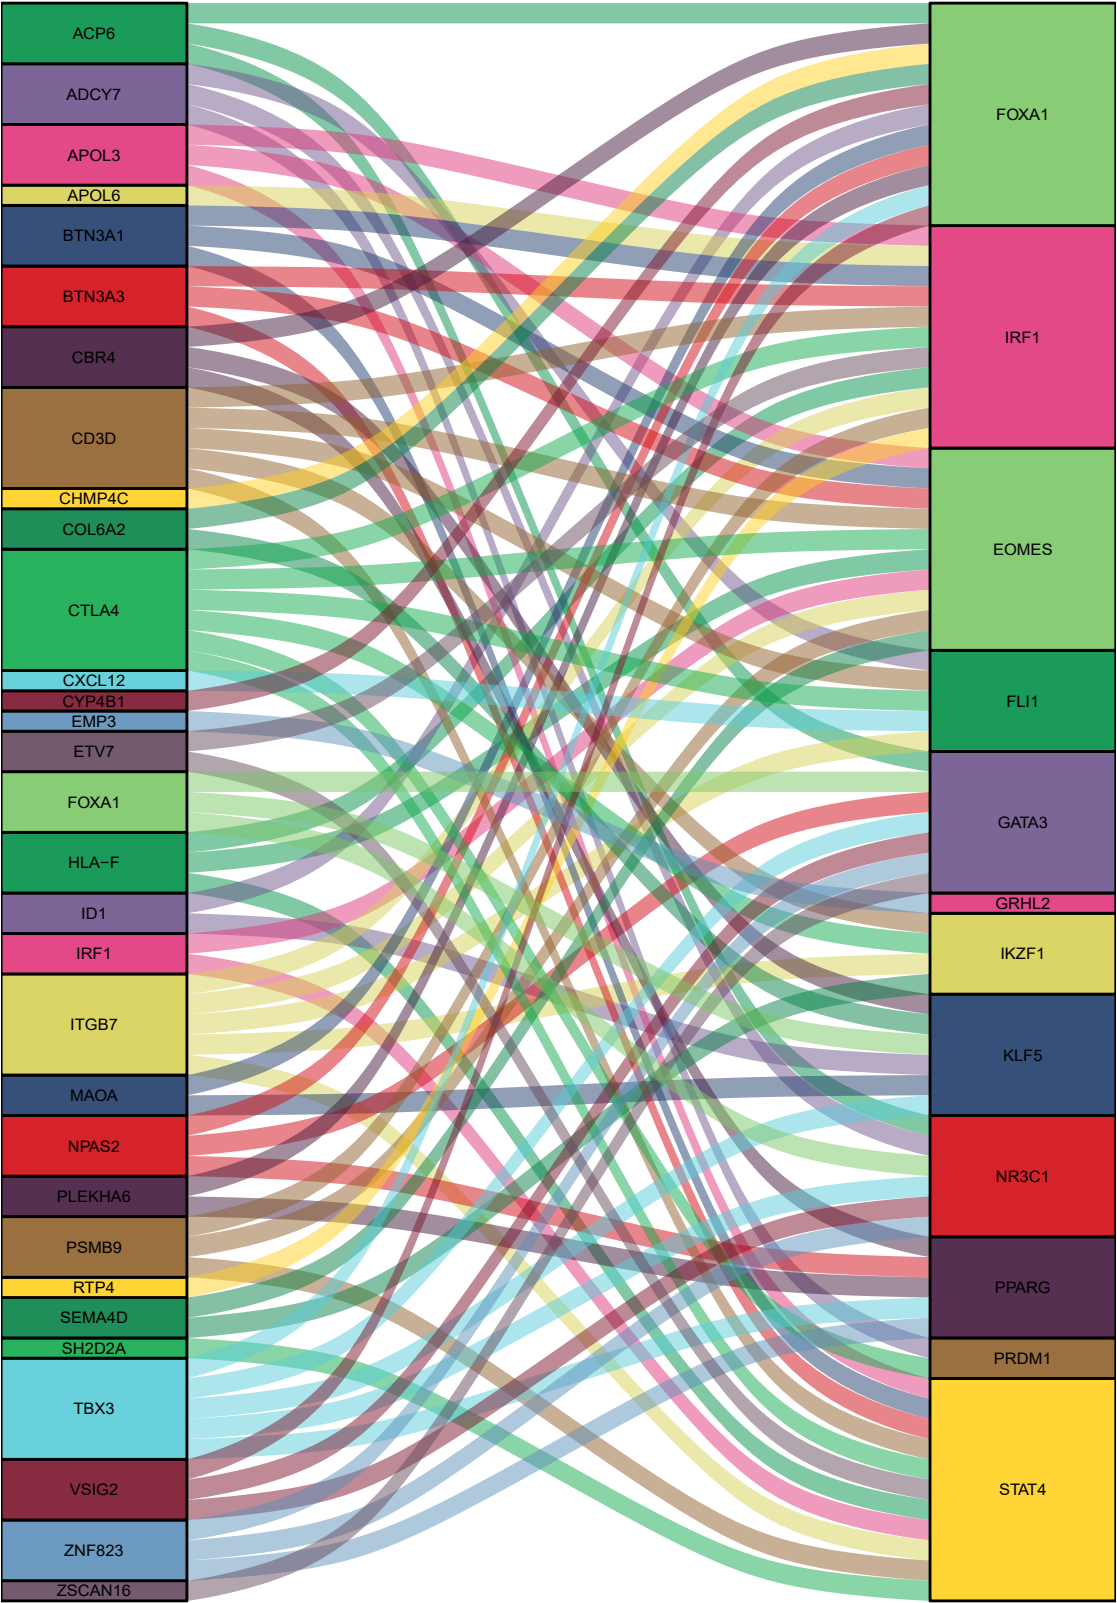

PRGs

TFs

Supplement: Data_Sheet_1.zip [file Figure 4B.pdf › all raw data/Figures/Figure 4/Figure 4B.pdf]

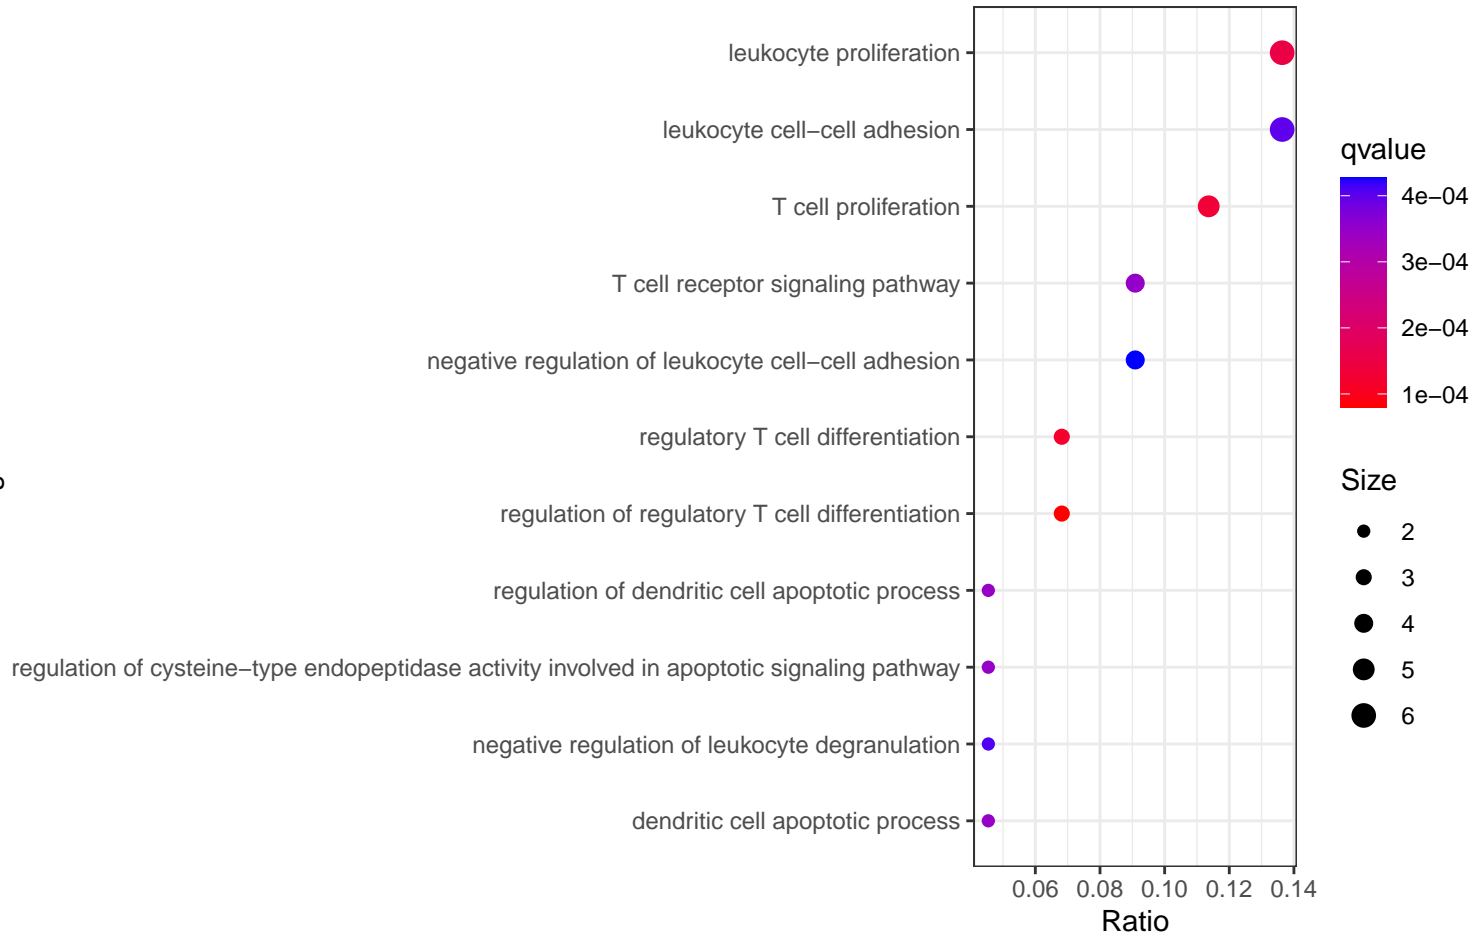

Supplement: Data_Sheet_1.zip [file Figure 4C.Pdf › all raw data/Figures/Figure 4/Figure 4C.Pdf]

Coefficients

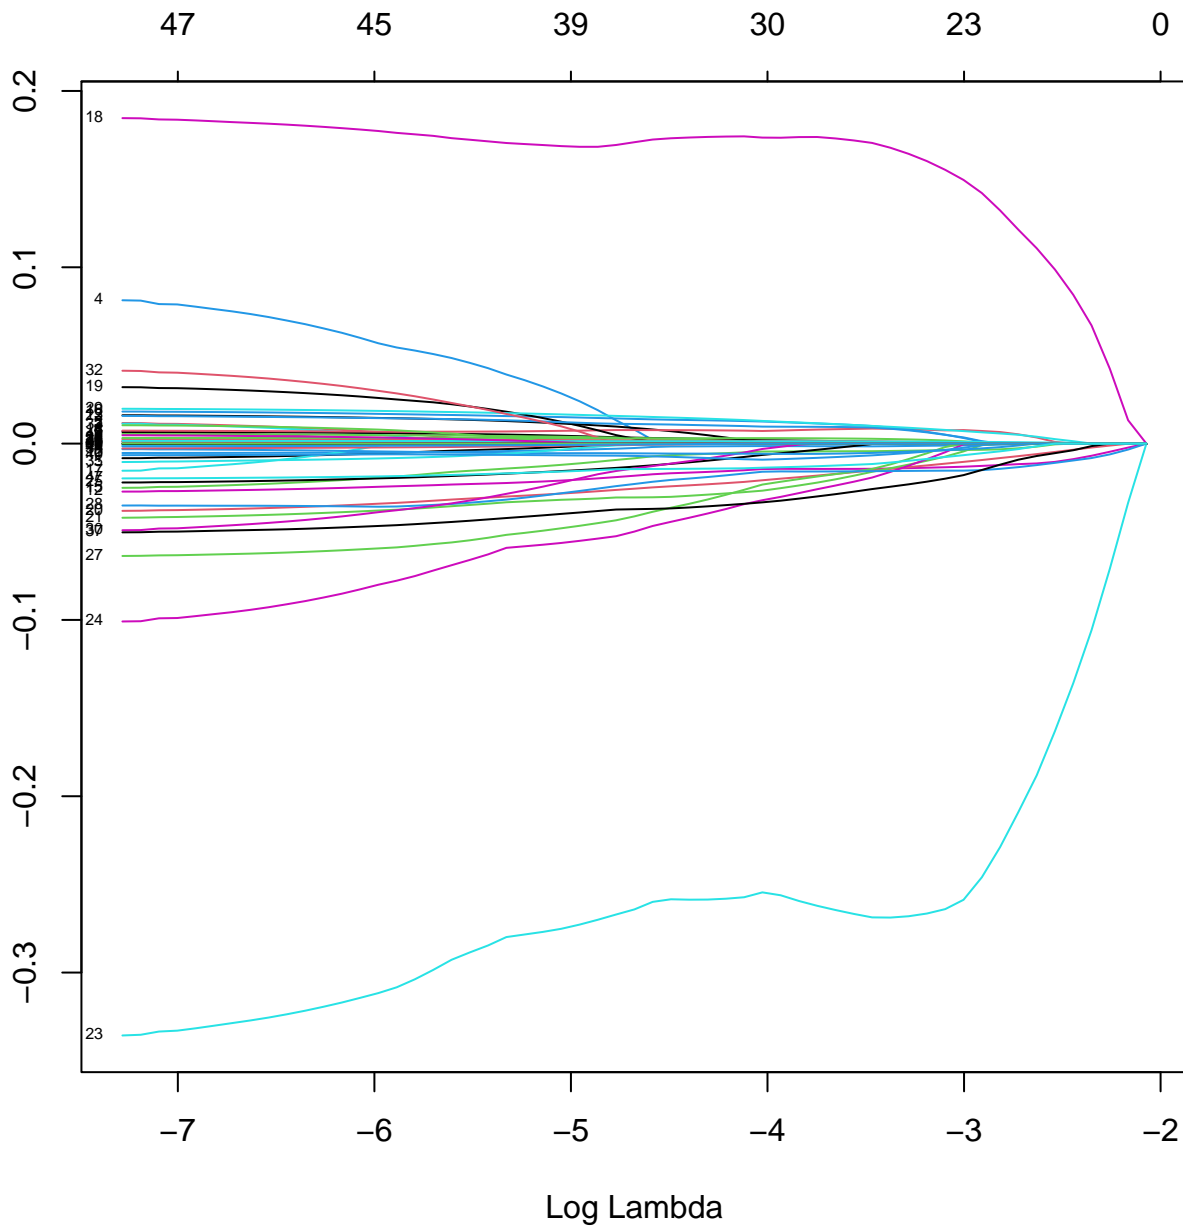

Supplement: Data_Sheet_1.zip [file Figure 5A.pdf › all raw data/Figures/Figure 5/Figure 5A.pdf]

Partial Likelihood Deviance

47 47 46 45 43 41 39 36 33 30 28 26 17 10 5

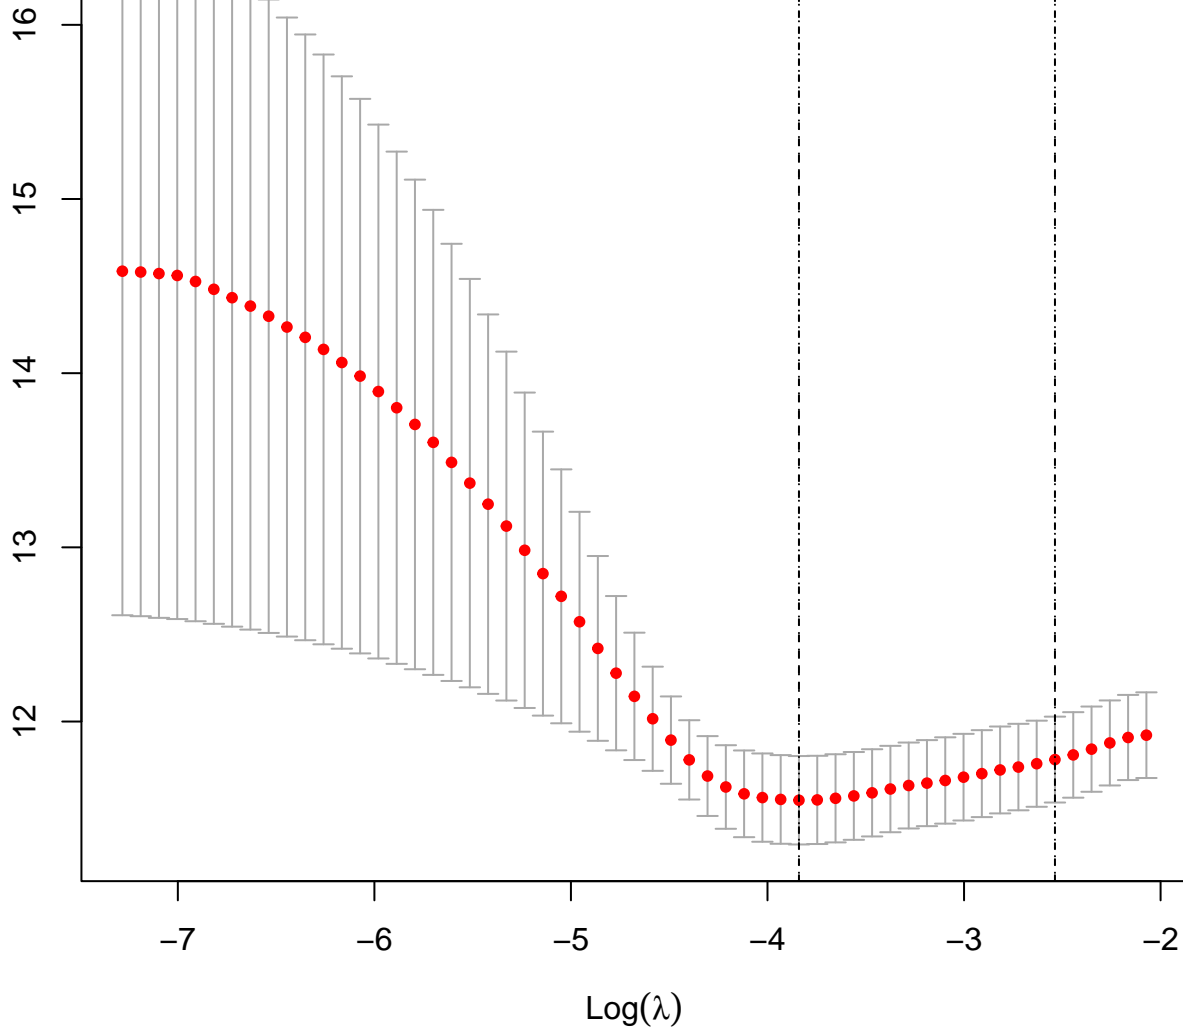

Supplement: Data_Sheet_1.zip [file Figure 5B.pdf › all raw data/Figures/Figure 5/Figure 5B.pdf]

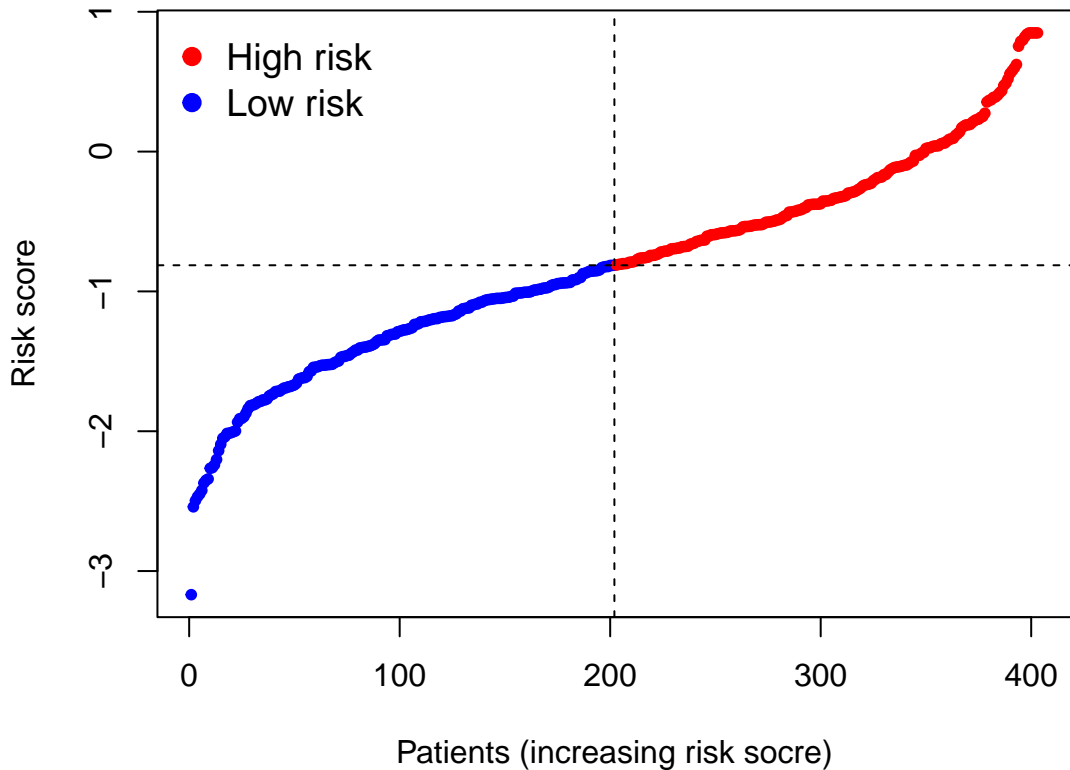

Supplement: Data_Sheet_1.zip [file Figure 5C.pdf › all raw data/Figures/Figure 5/Figure 5C.pdf]

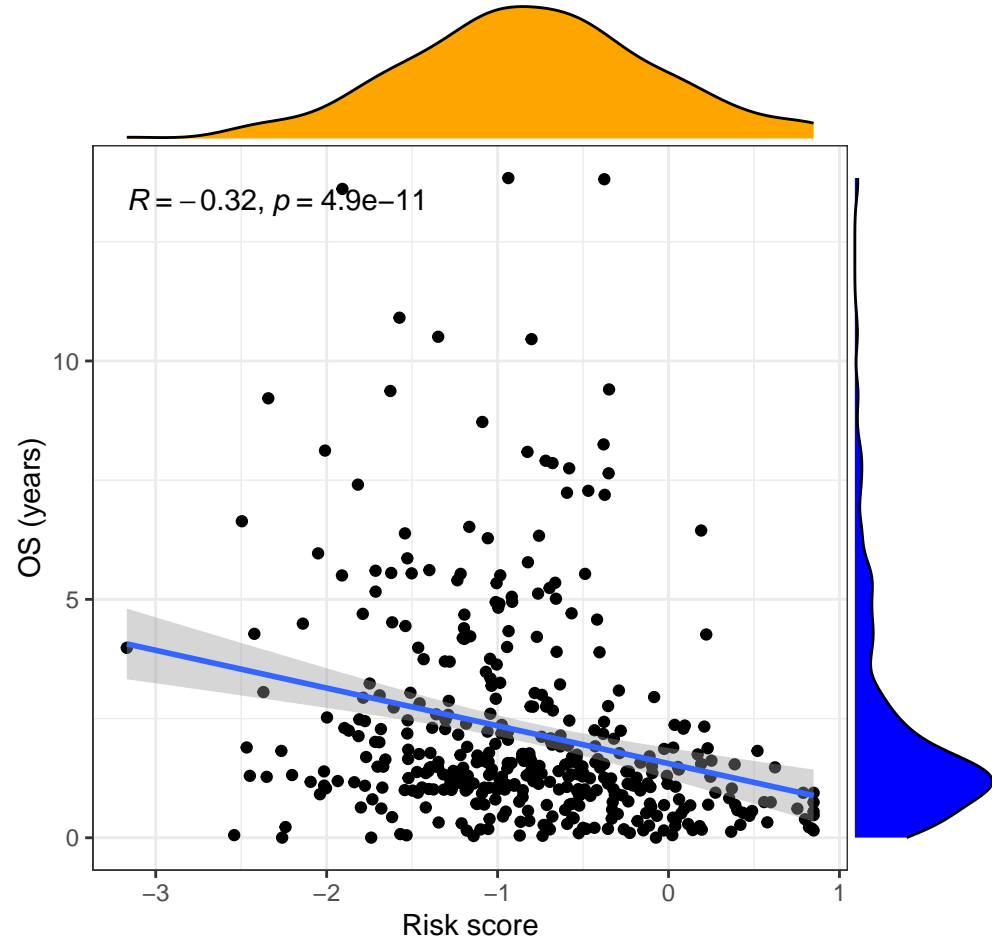

Supplement: Data_Sheet_1.zip [file Figure 5D.pdf › all raw data/Figures/Figure 5/Figure 5D.pdf]

Risk + High risk + Low risk

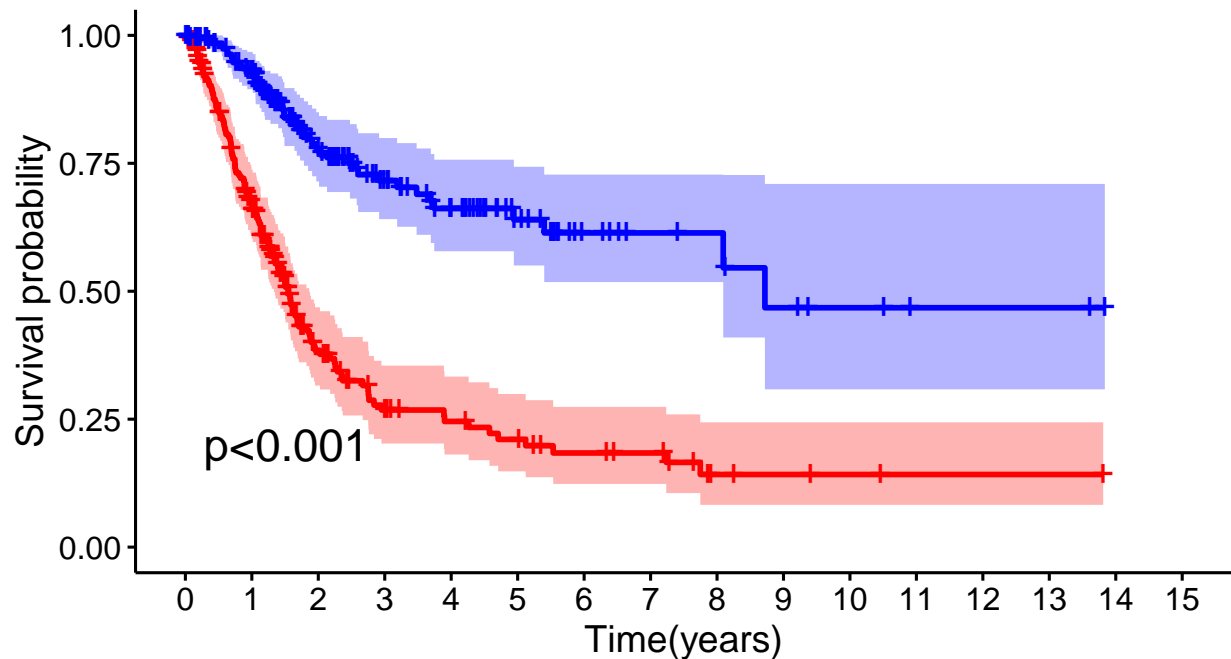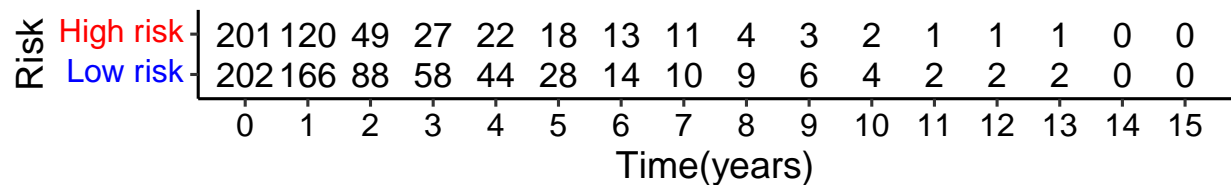

Supplement: Data_Sheet_1.zip [file Figure 5E.pdf › all raw data/Figures/Figure 5/Figure 5E.pdf]

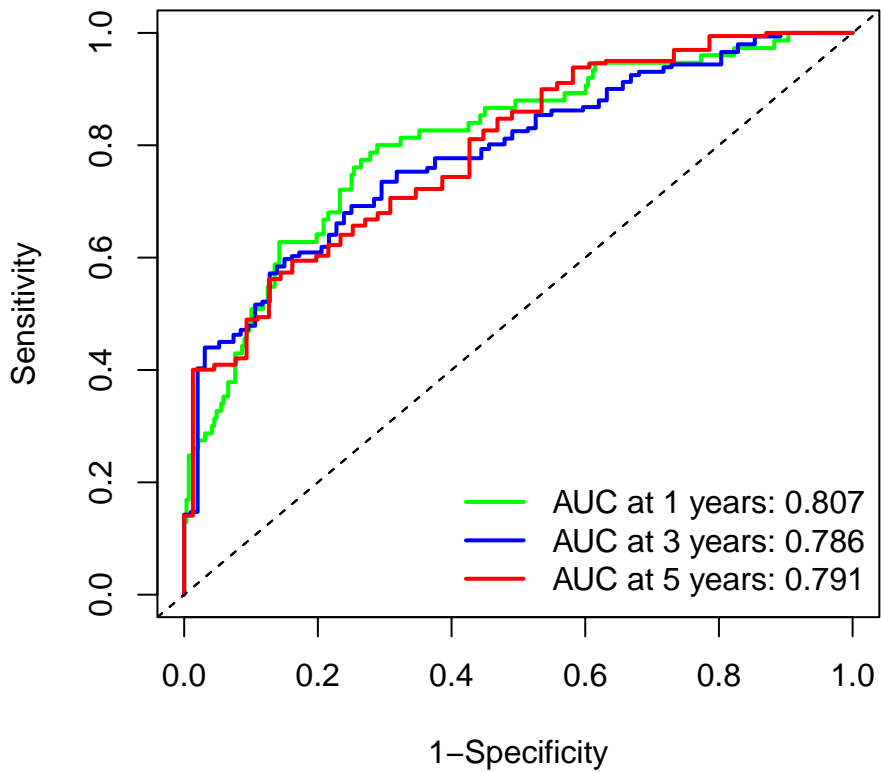

Supplement: Data_Sheet_1.zip [file Figure 5F.pdf › all raw data/Figures/Figure 5/Figure 5F.pdf]

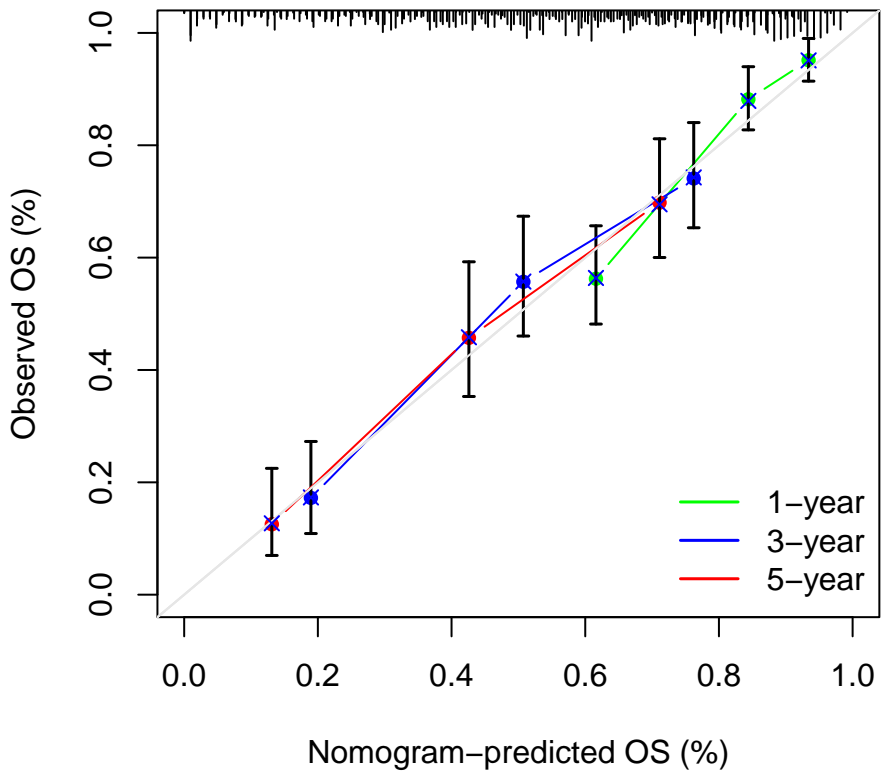

Supplement: Data_Sheet_1.zip [file Figure 5G.pdf › all raw data/Figures/Figure 5/Figure 5G.pdf]

# Effect of ADCY7 expression level on BLCA patient survival

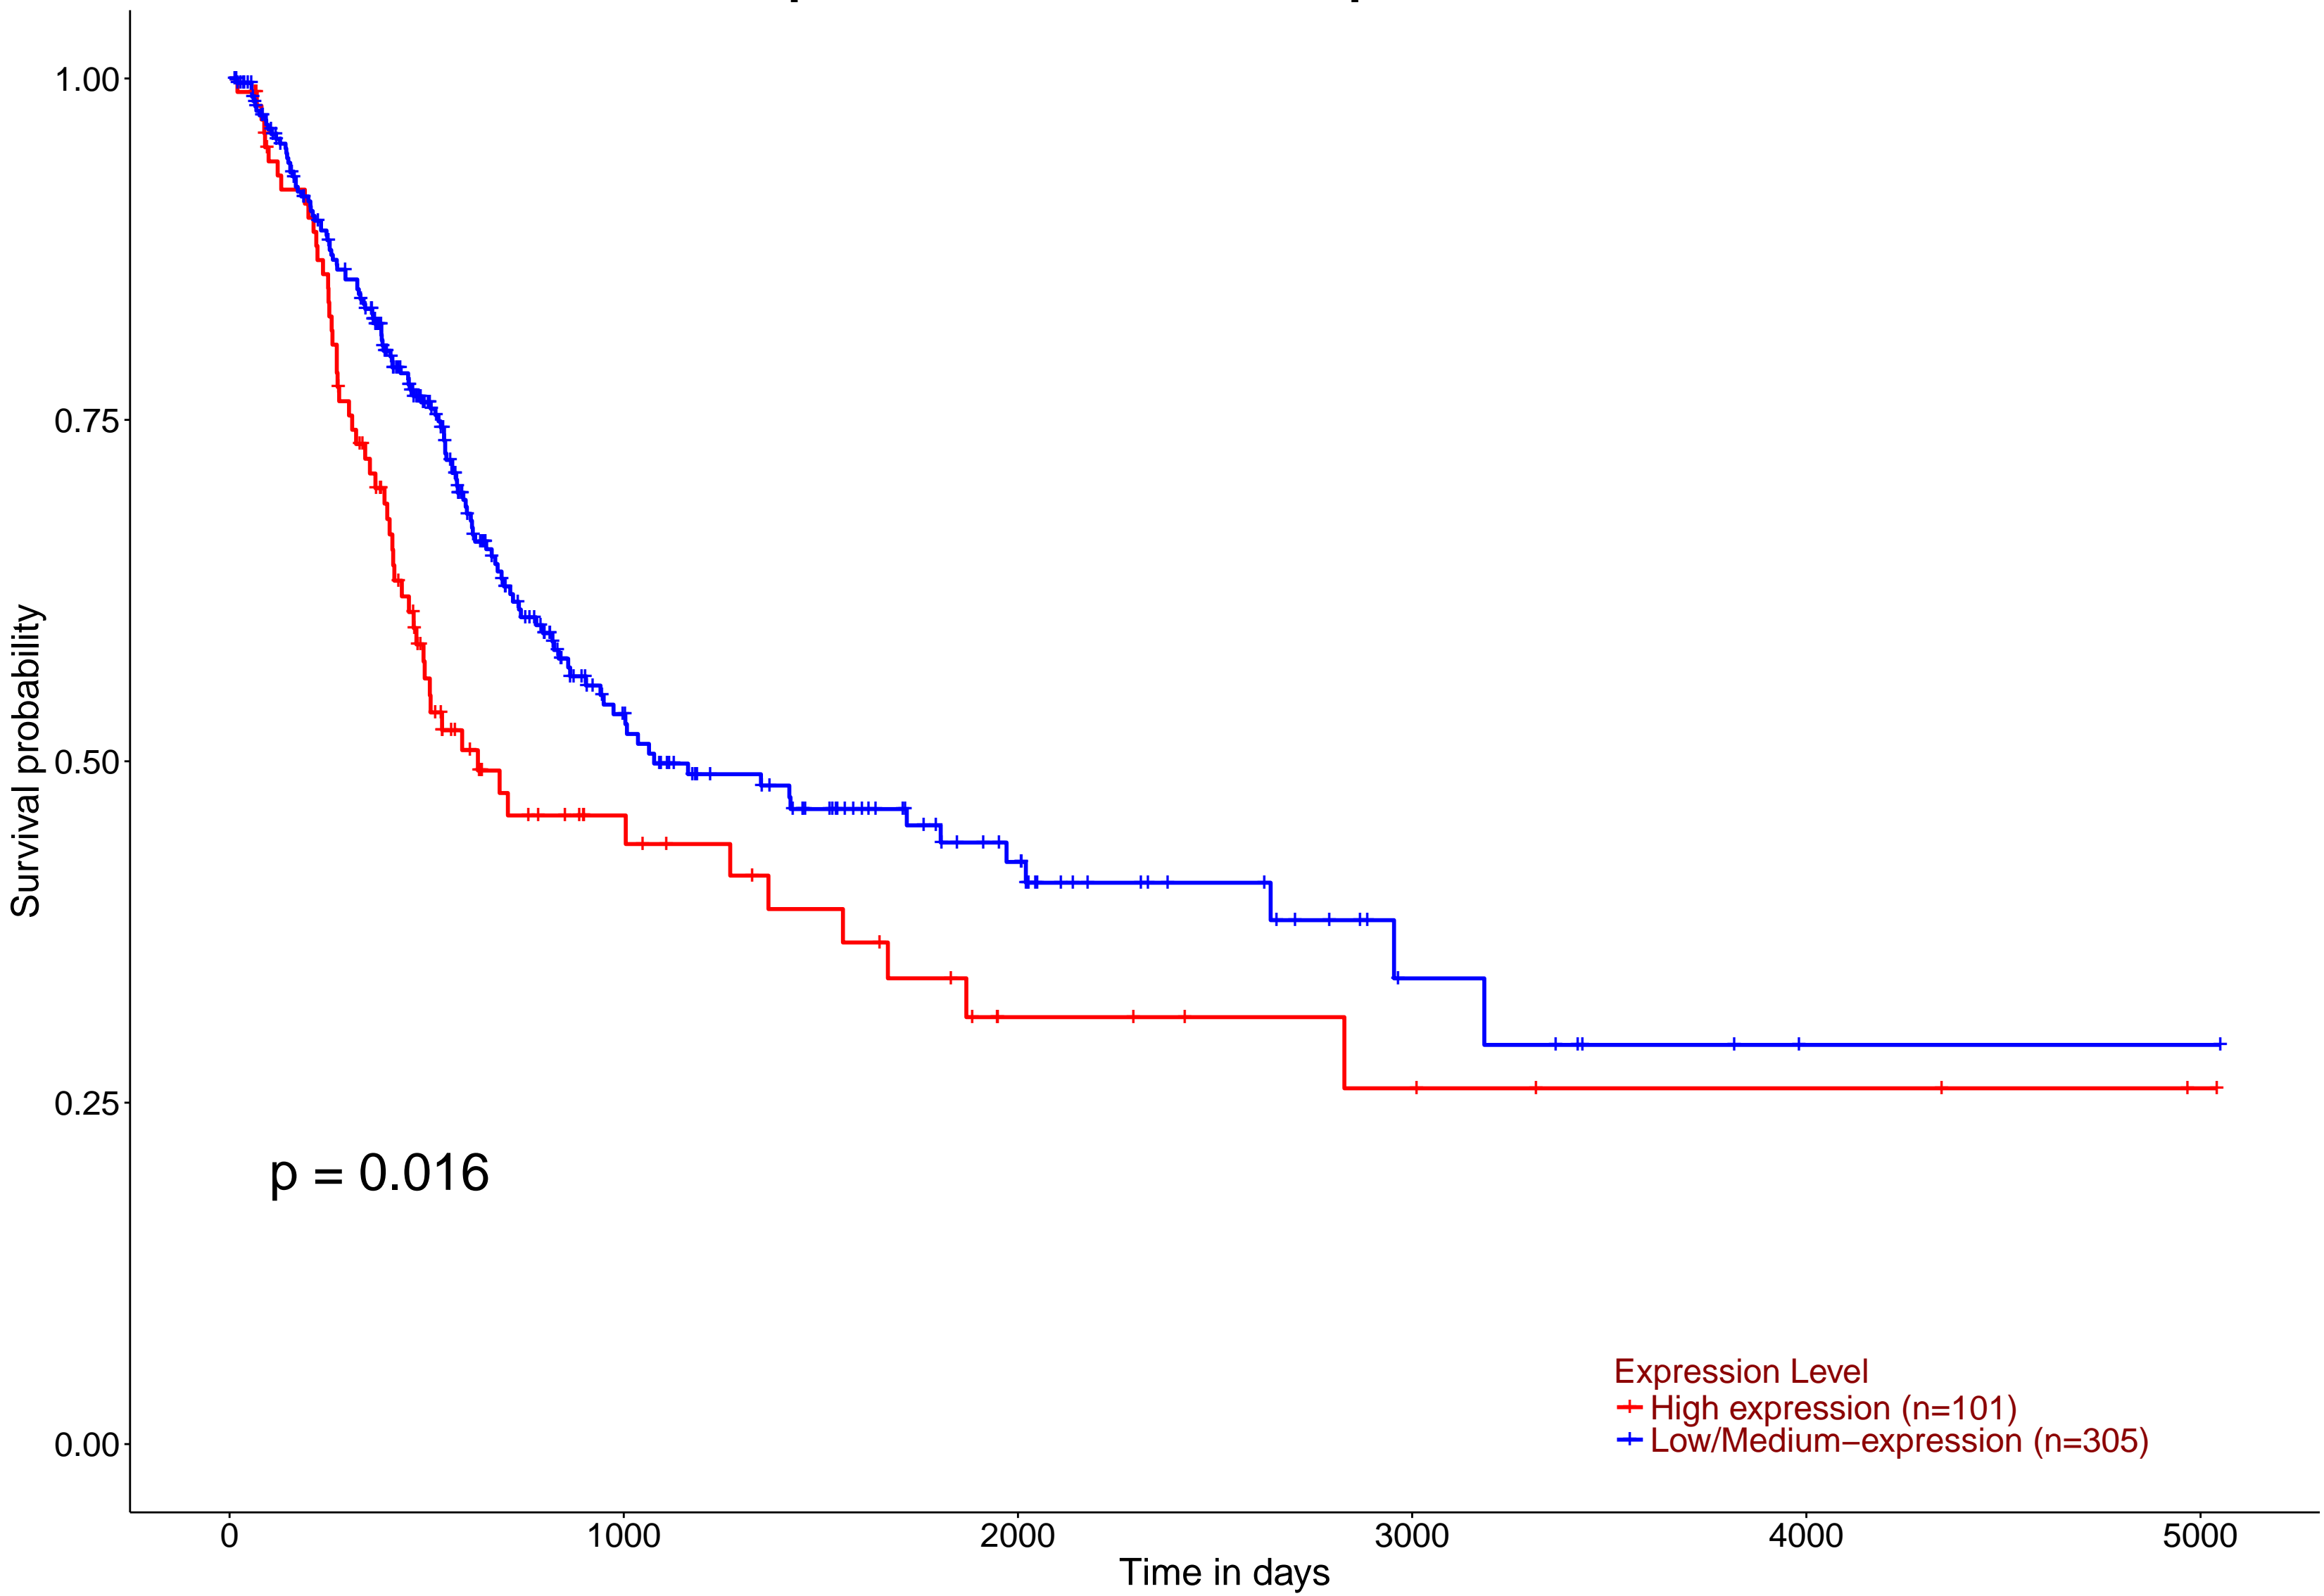

Supplement: Data_Sheet_1.zip [file Figure 6A.pdf › all raw data/Figures/Figure 6/Figure 6A.pdf]

# Effect of SLC1A6 expression level on BLCA patient survival

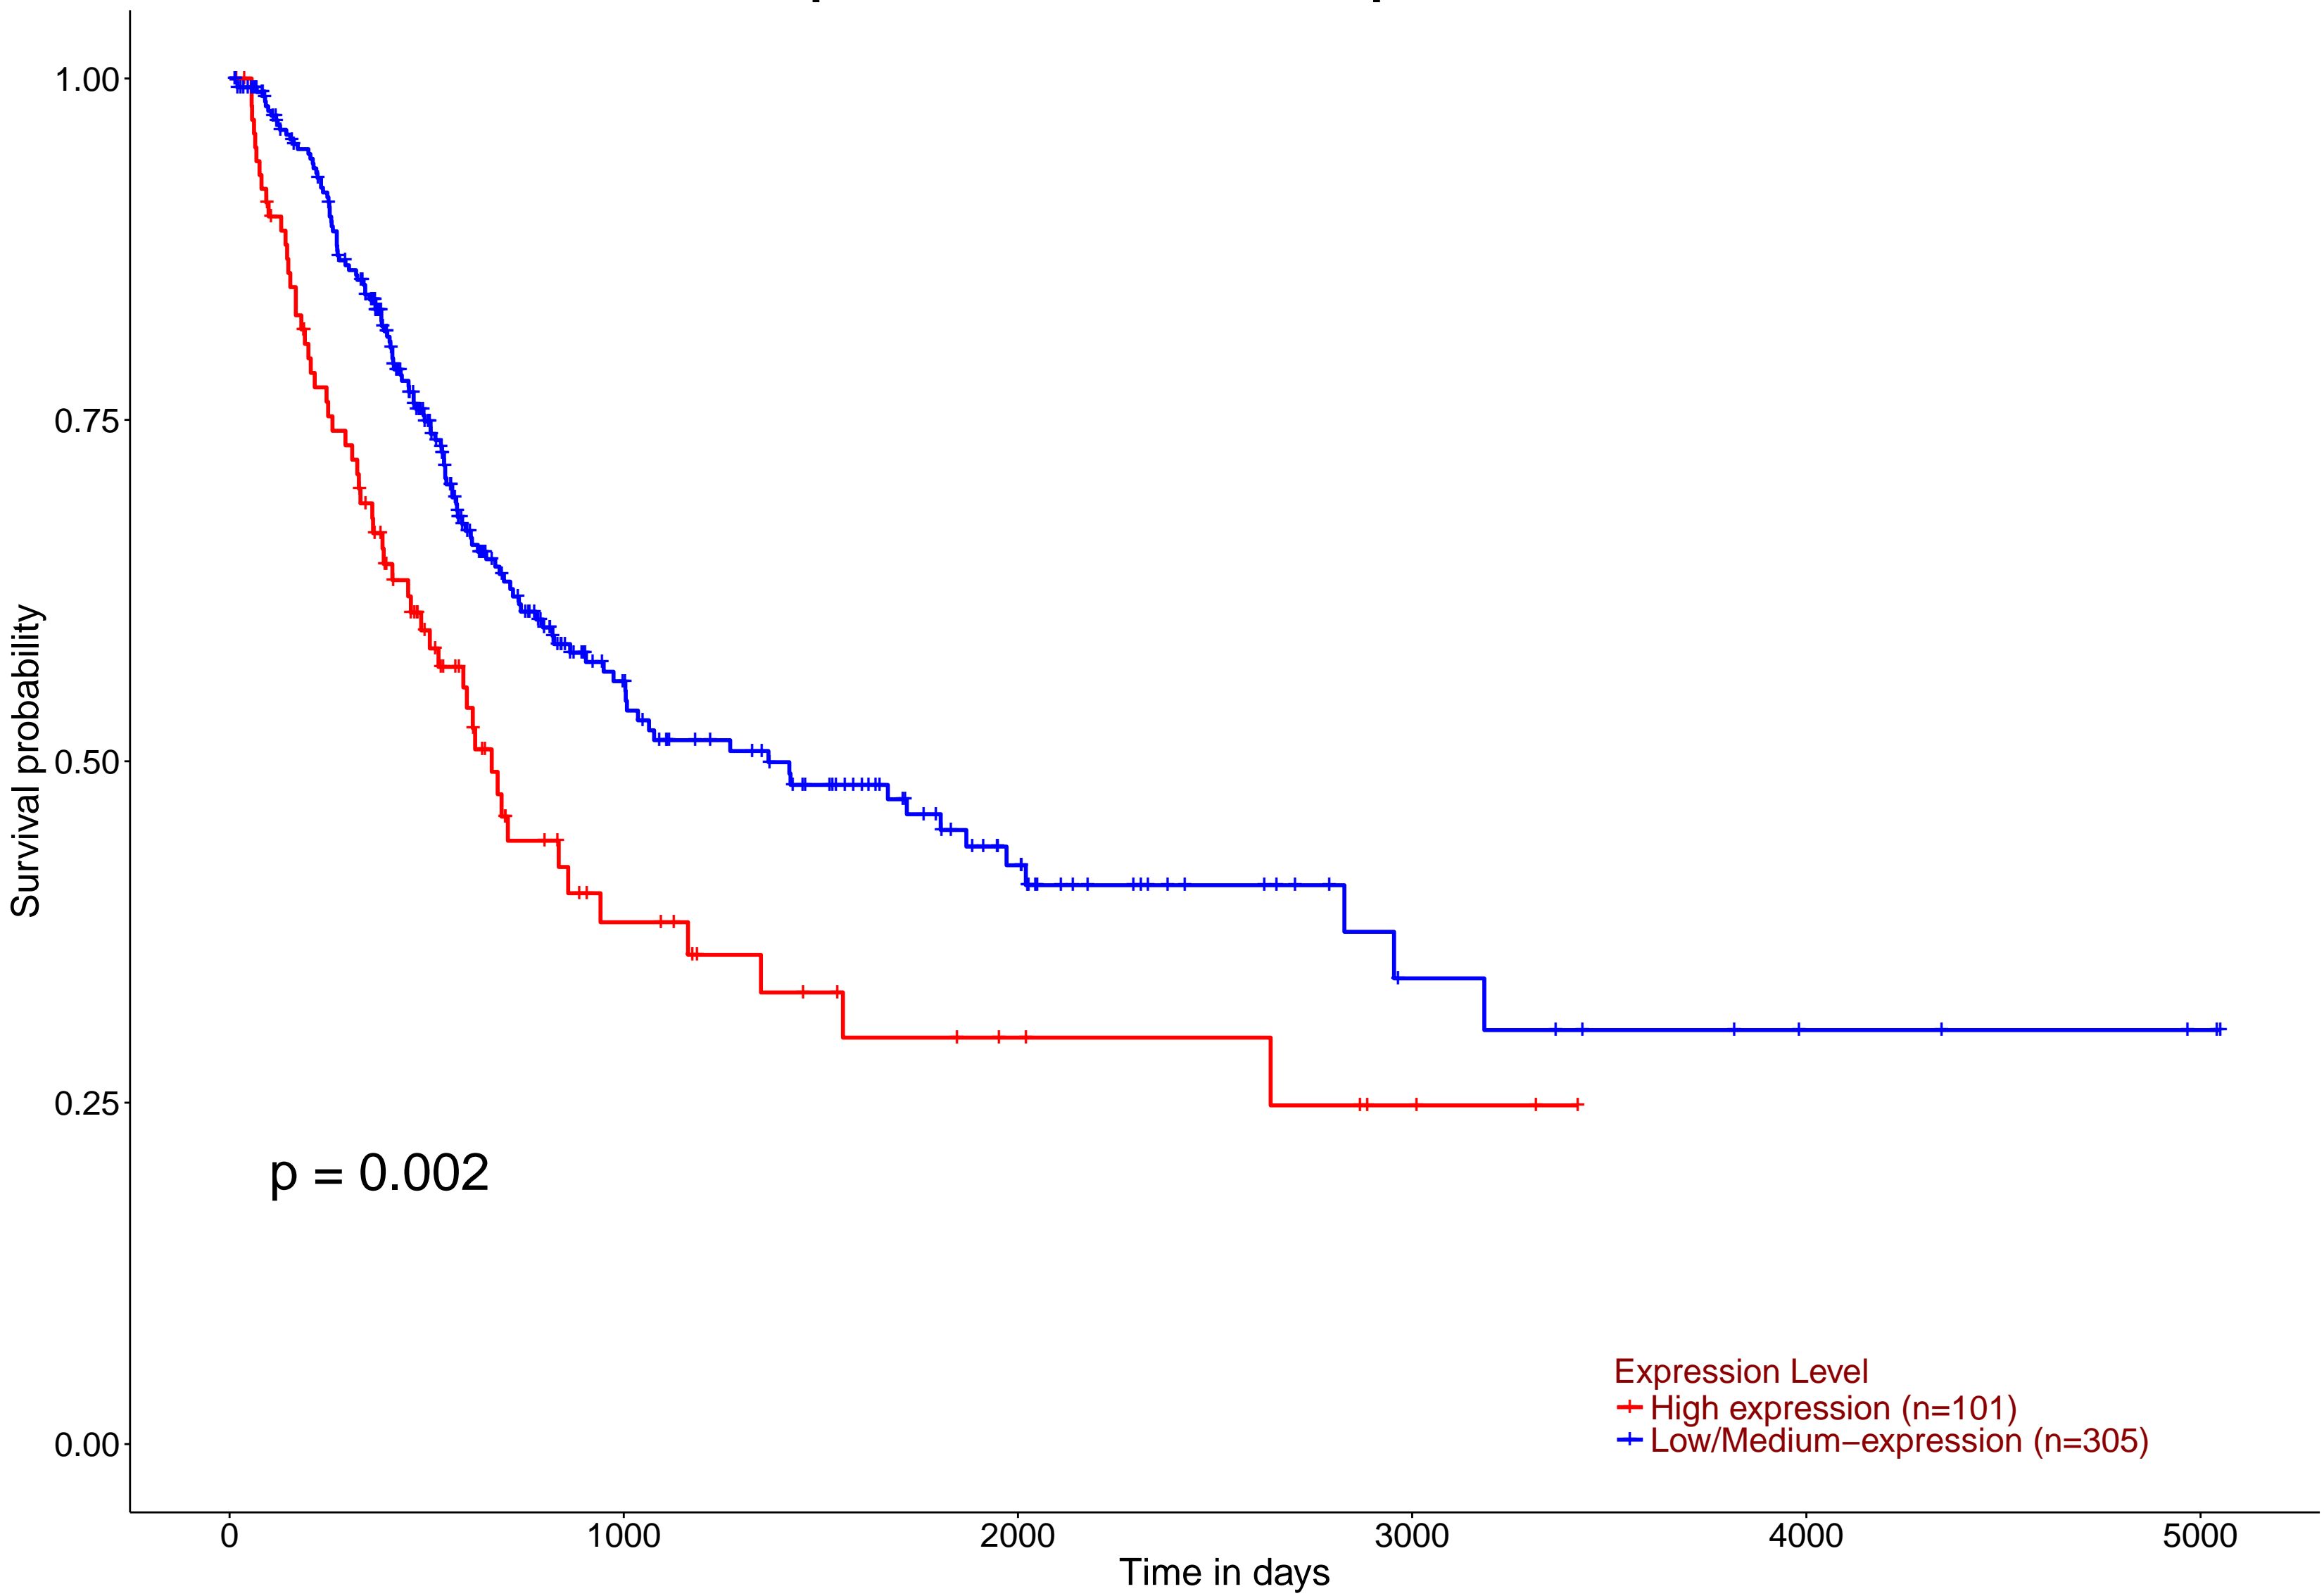

Supplement: Data_Sheet_1.zip [file Figure 6B.pdf › all raw data/Figures/Figure 6/Figure 6B.pdf]

Effect of NELL2 expression level on BLCA patient survival

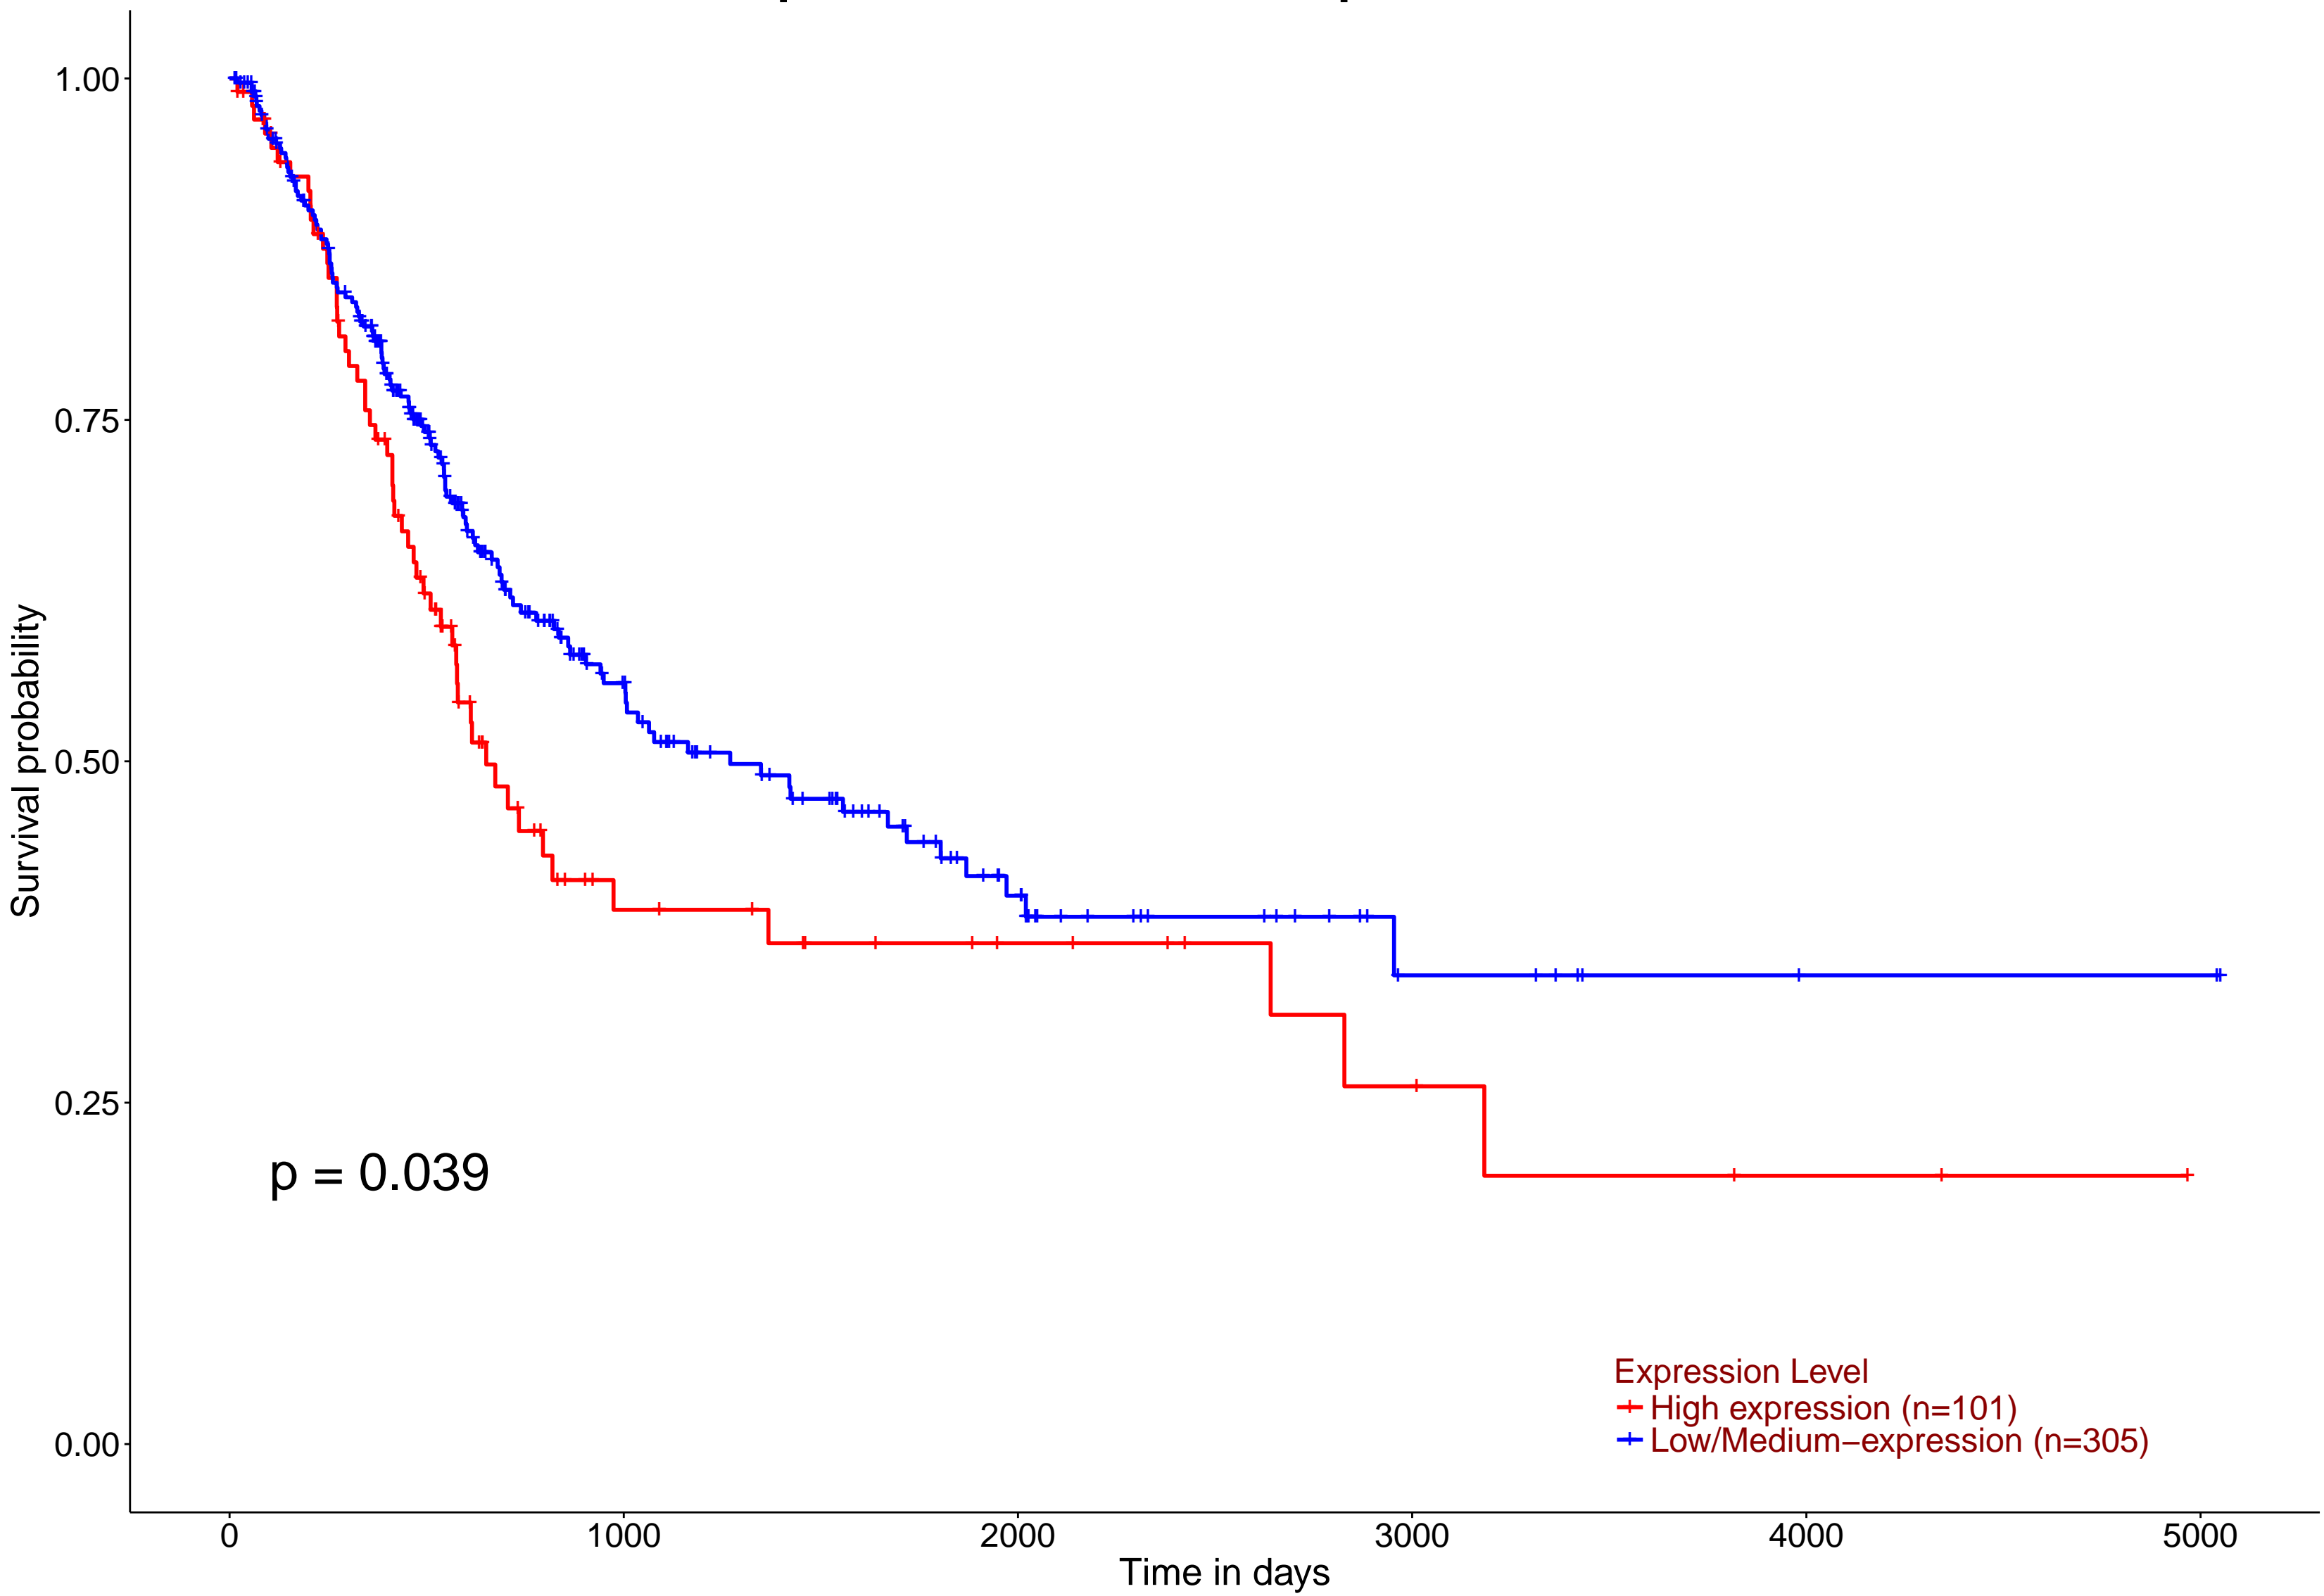

Supplement: Data_Sheet_1.zip [file Figure 6C.pdf › all raw data/Figures/Figure 6/Figure 6C.pdf]

# Effect of ITGB7 expression level on BLCA patient survival

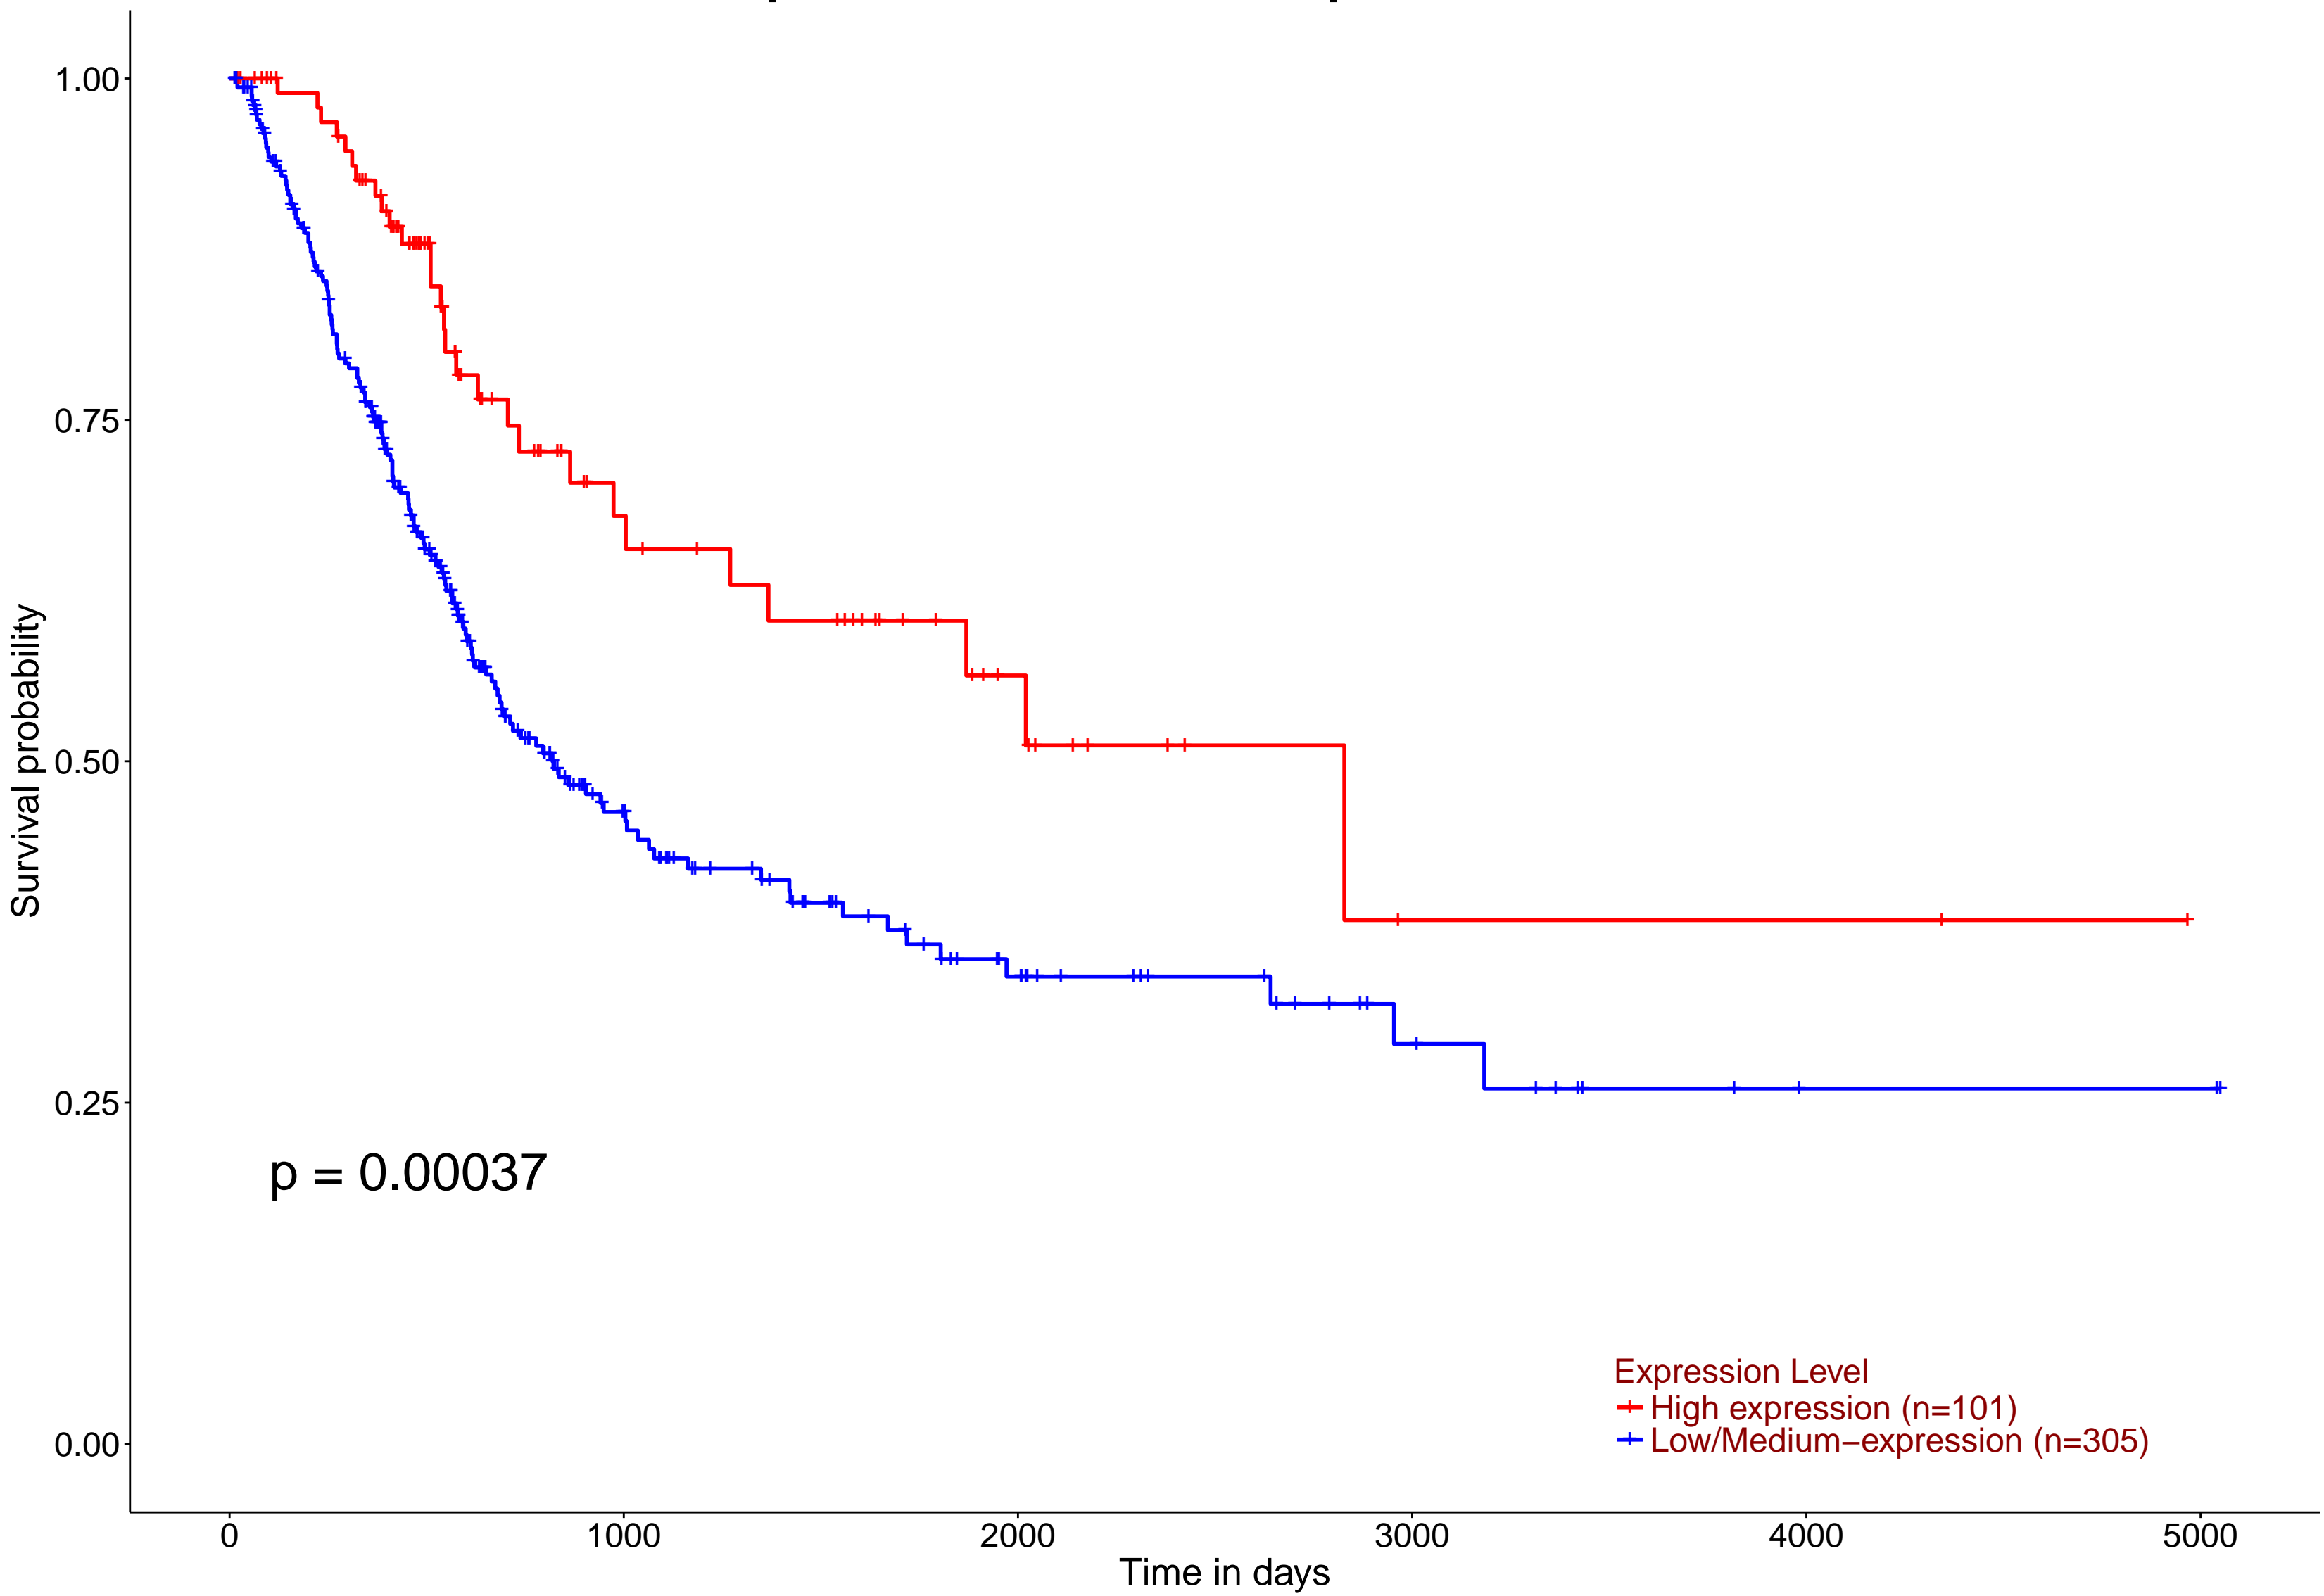

Supplement: Data_Sheet_1.zip [file Figure 6D.pdf › all raw data/Figures/Figure 6/Figure 6D.pdf]

# Effect of ZNF823 expression level on BLCA patient survival

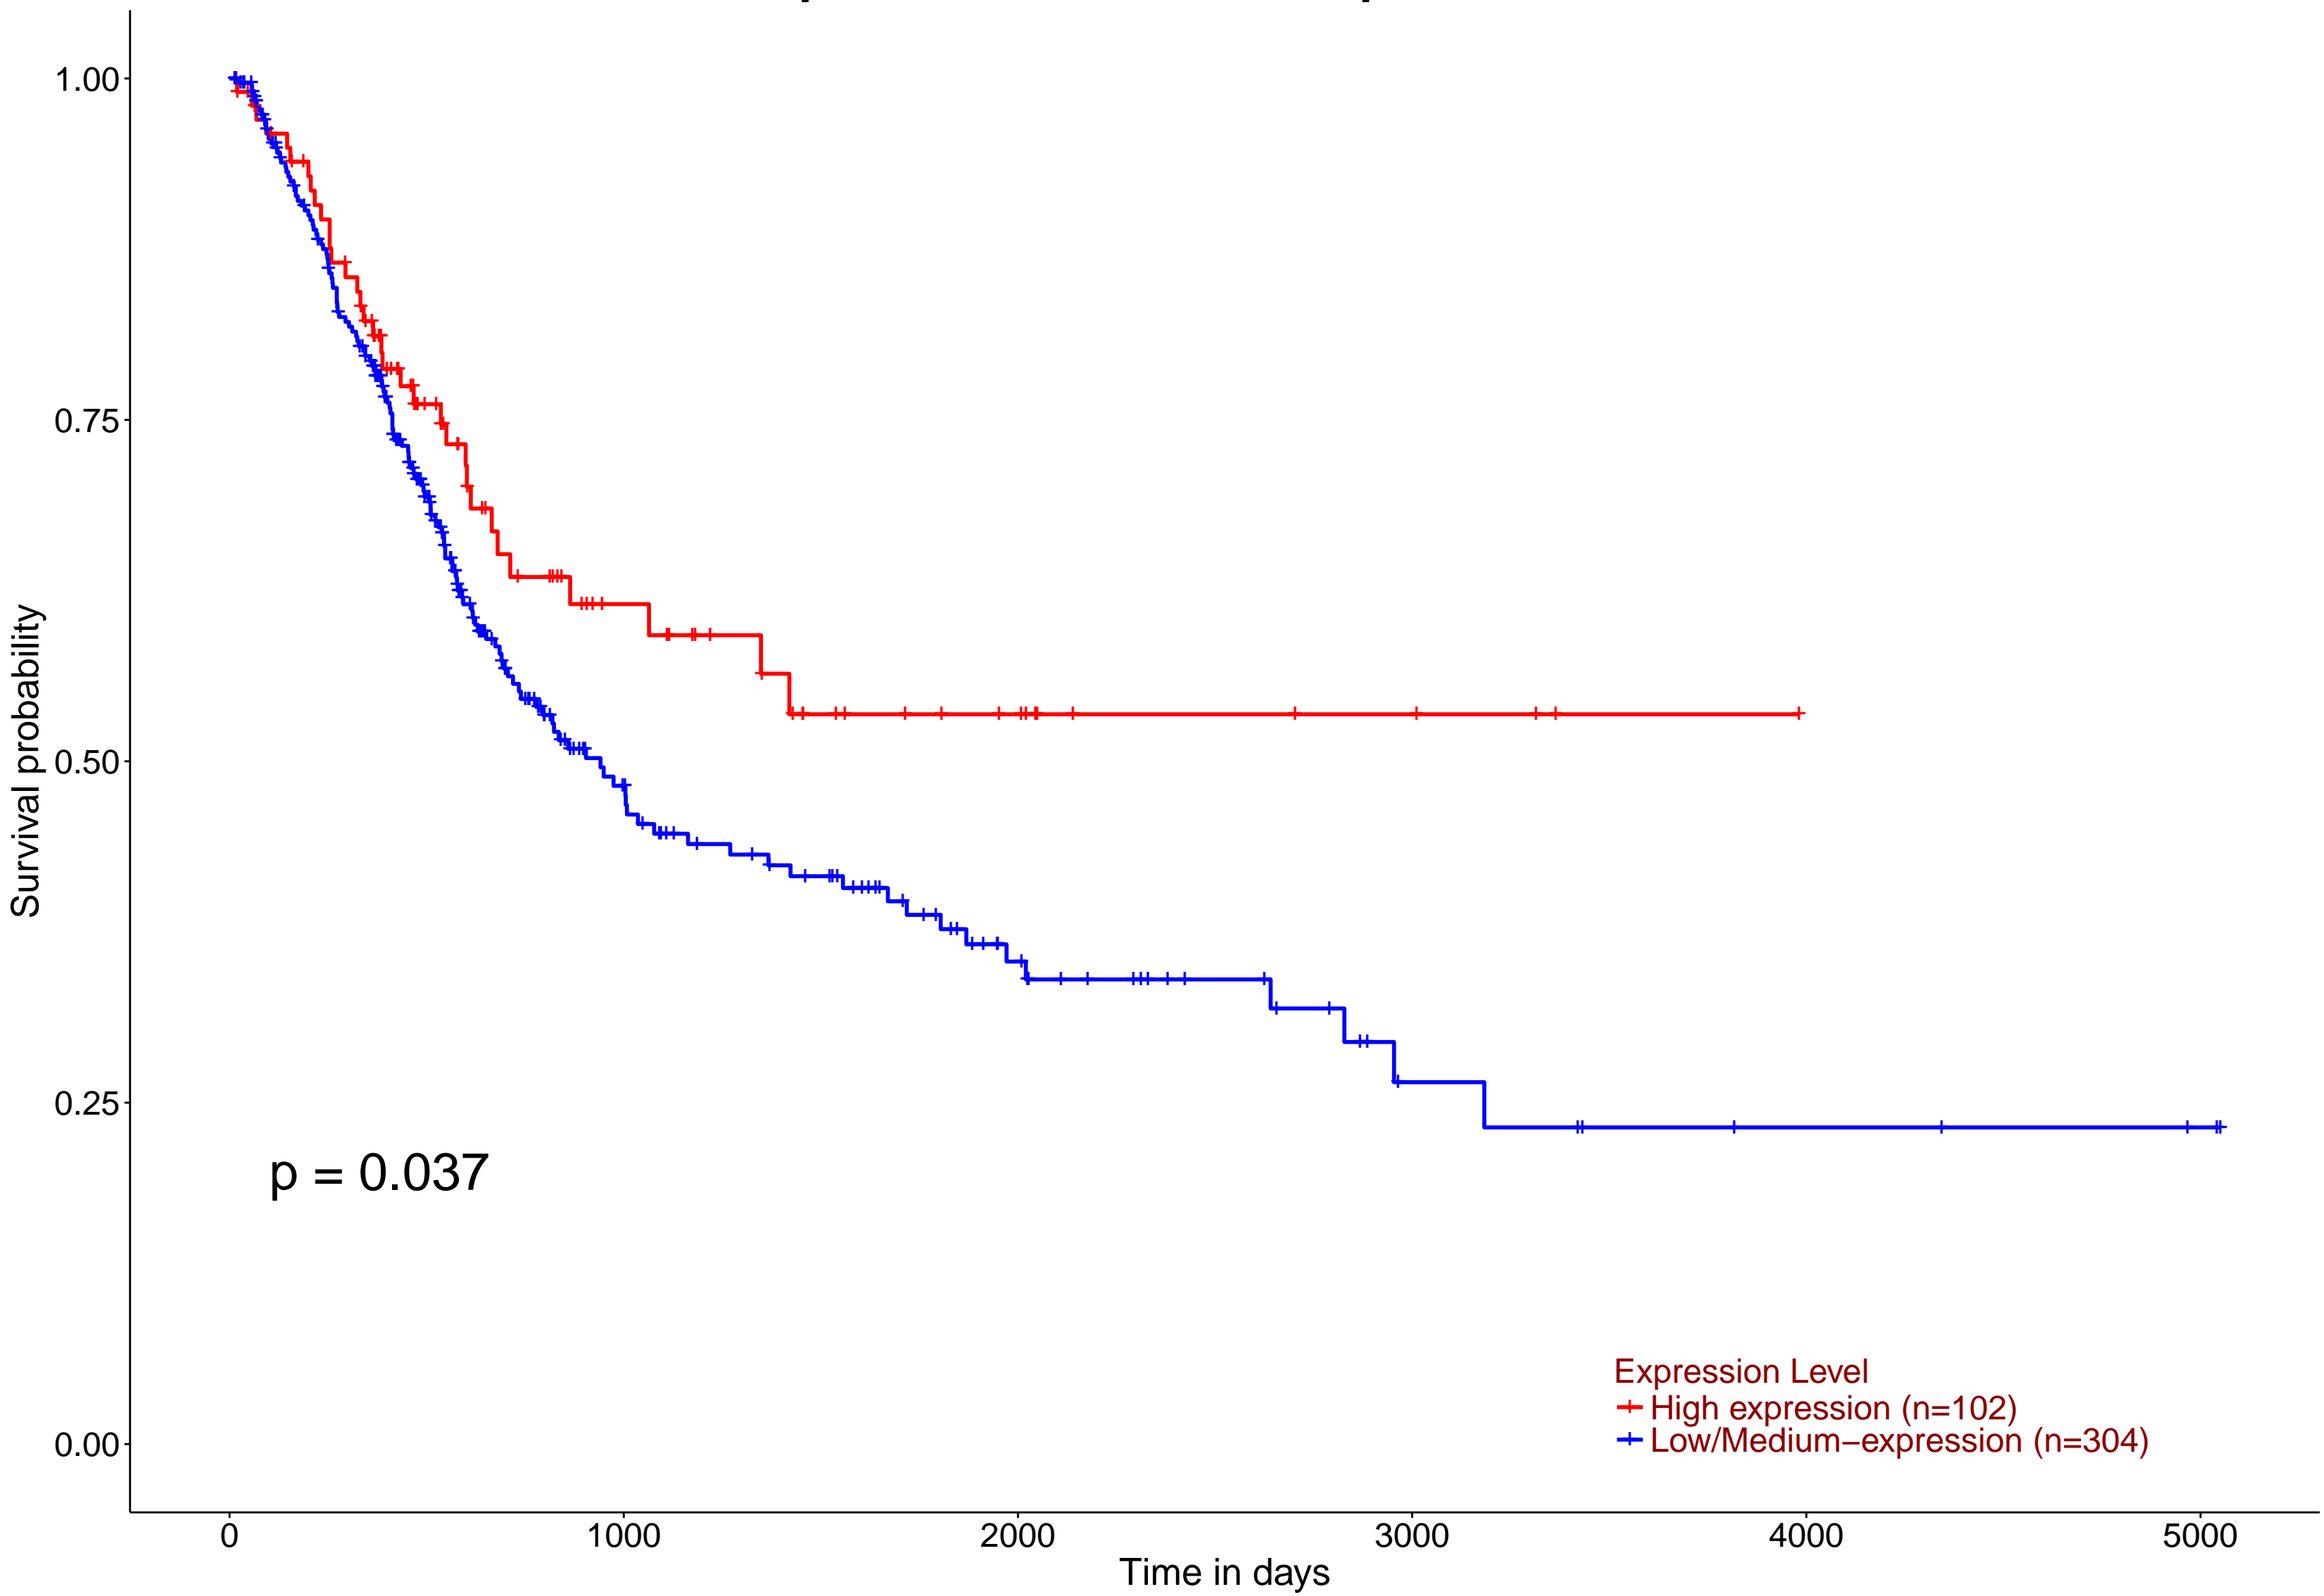

Supplement: Data_Sheet_1.zip [file Figure 6E.pdf › all raw data/Figures/Figure 6/Figure 6E.pdf]

# Effect of CTLA4 expression level on BLCA patient survival

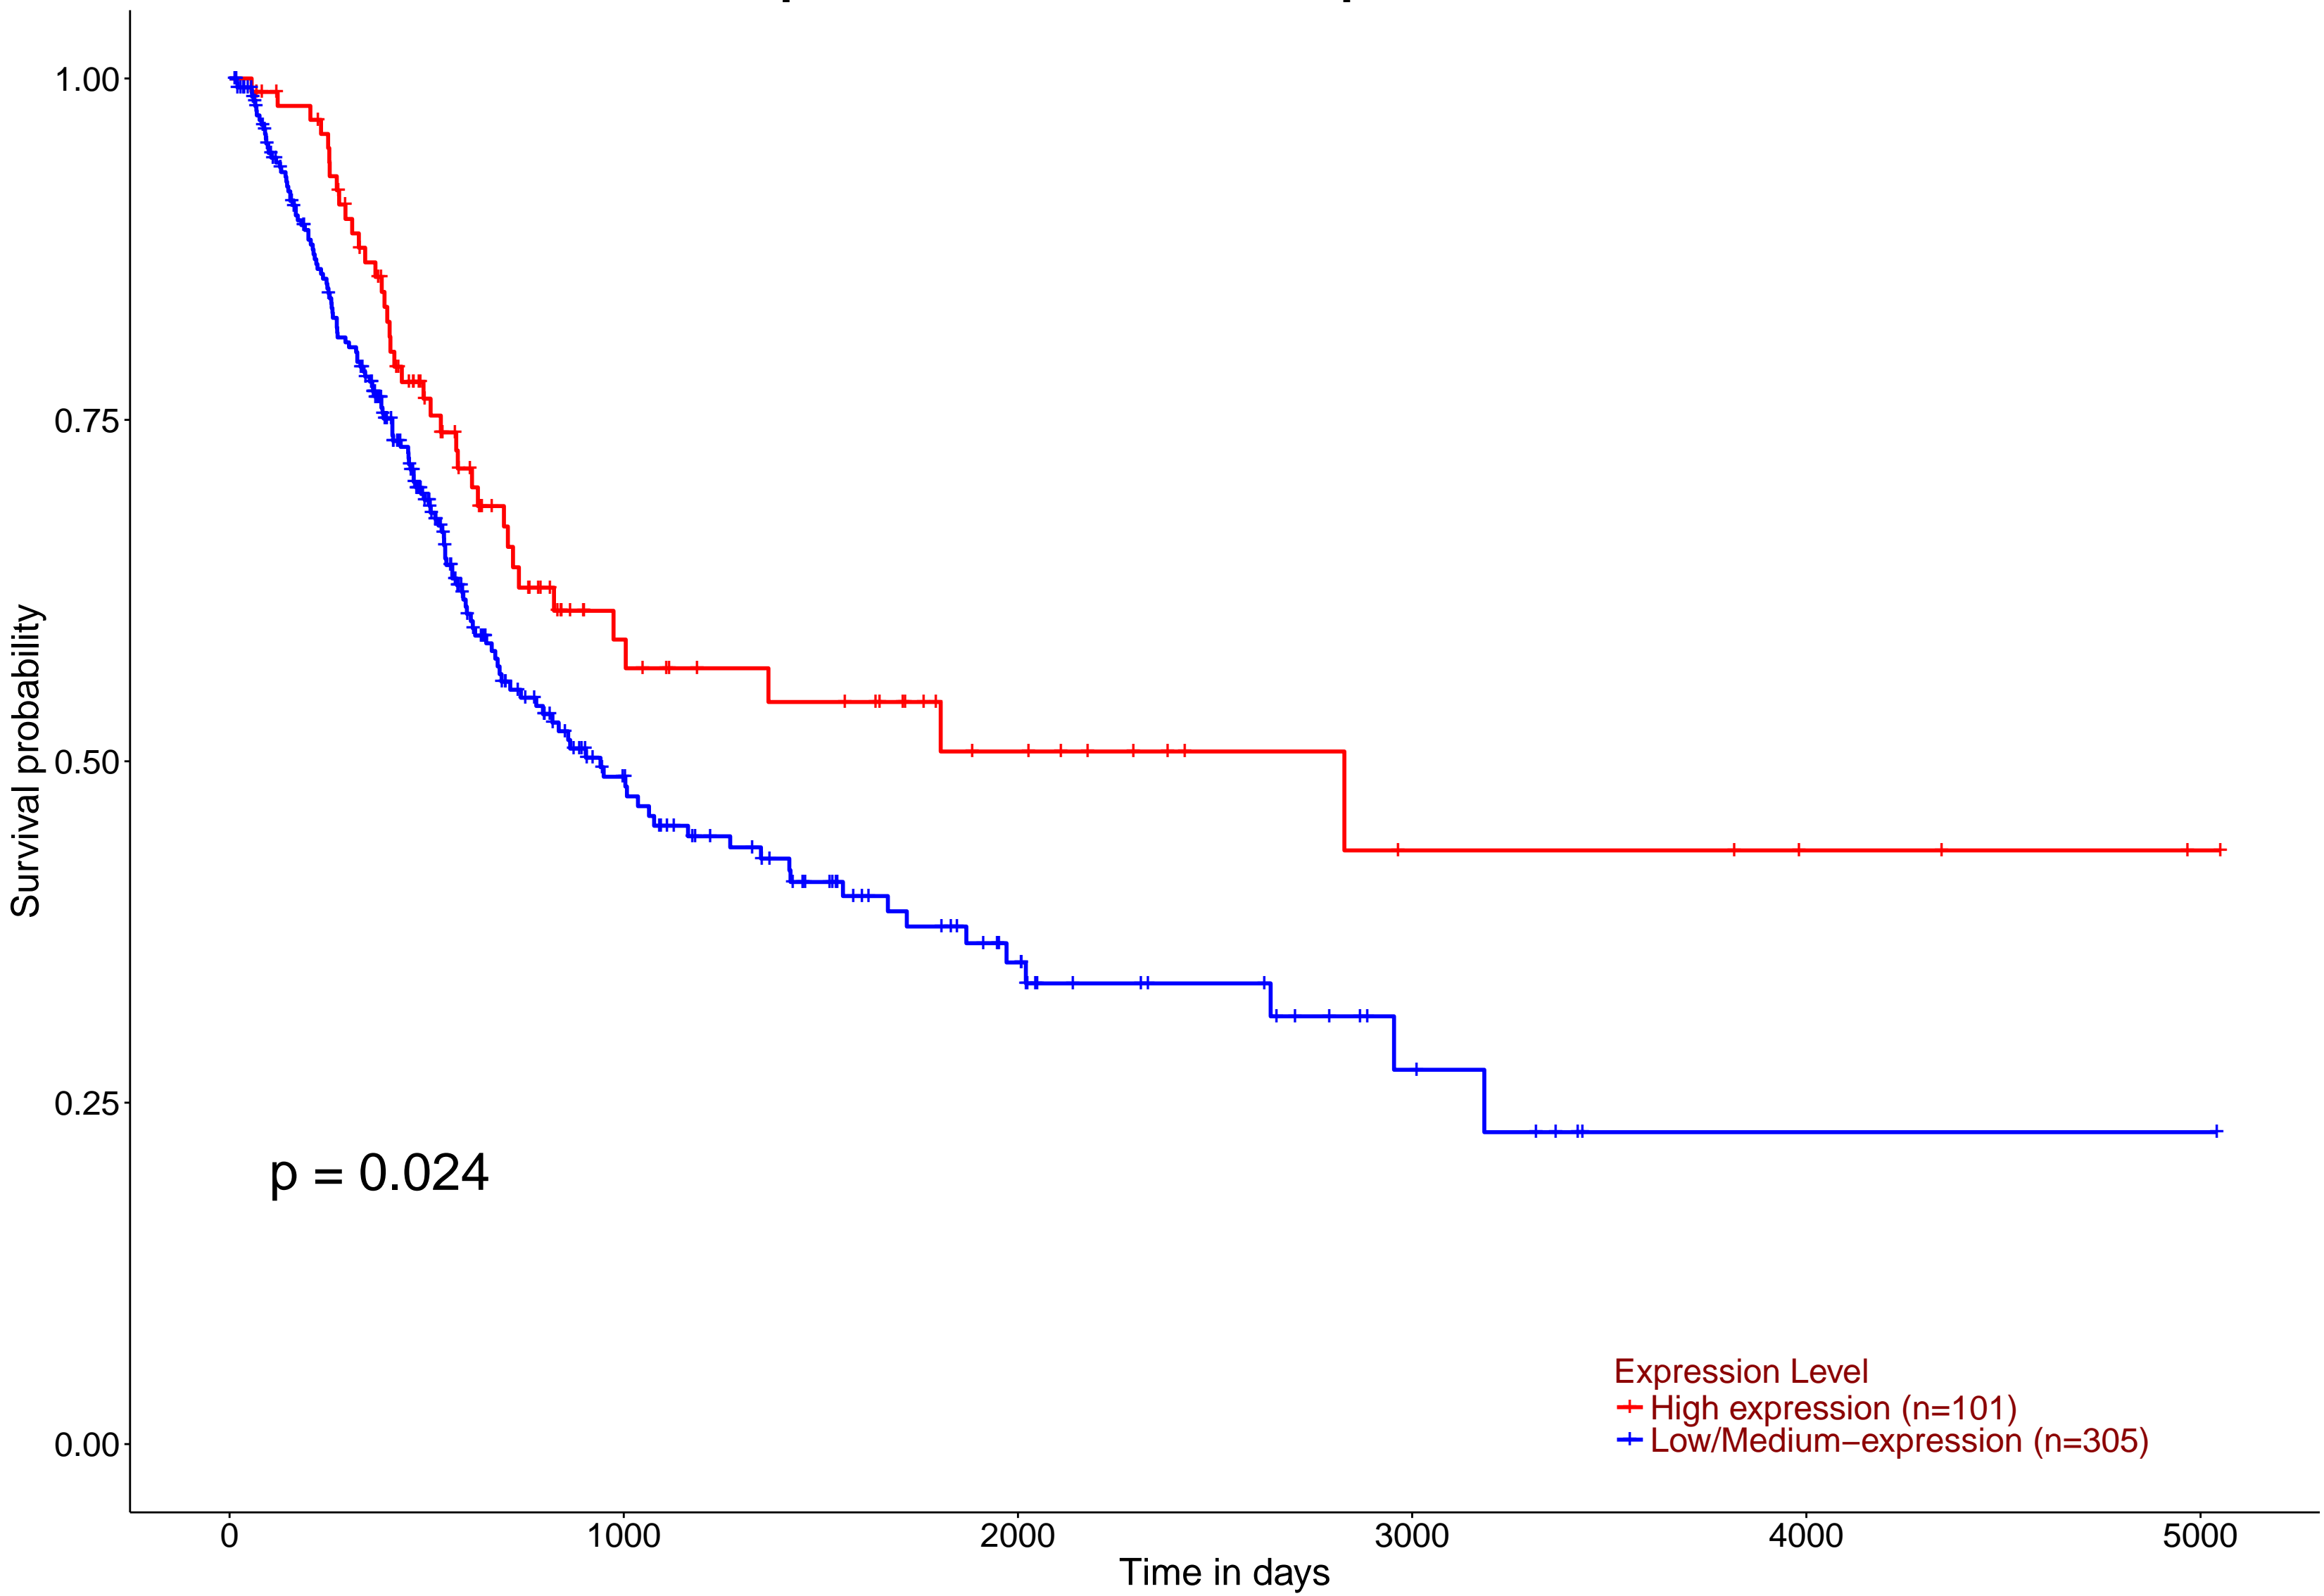

Supplement: Data_Sheet_1.zip [file Figure 6F.pdf › all raw data/Figures/Figure 6/Figure 6F.pdf]

Low-risk High-risk

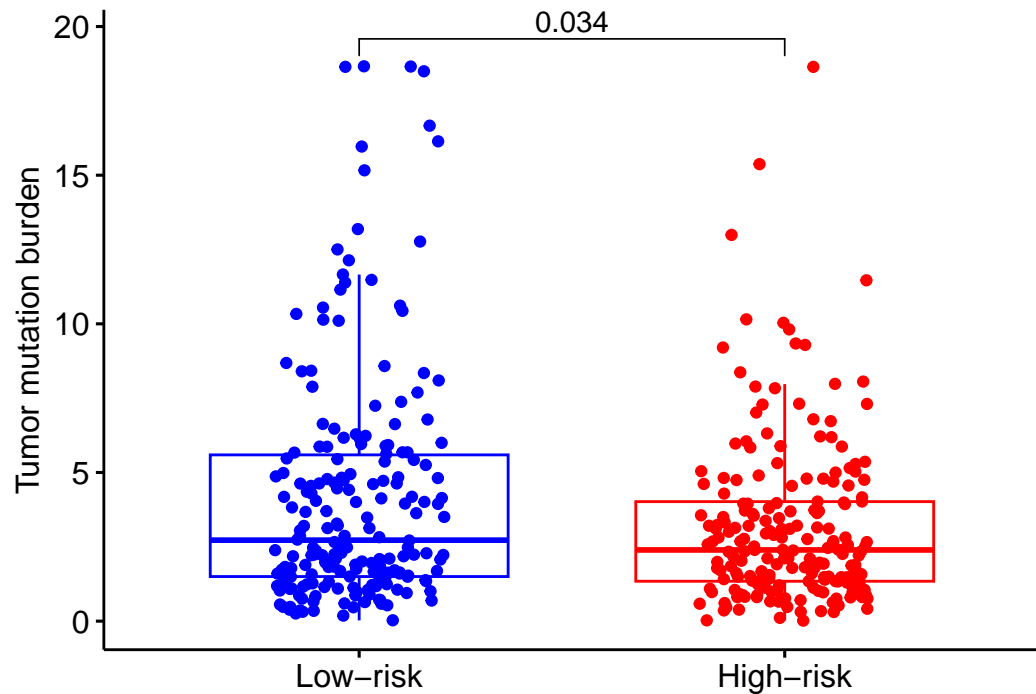

Supplement: Data_Sheet_1.zip [file Figure 8A.pdf › all raw data/Figures/Figure 8/Figure 8A.pdf]

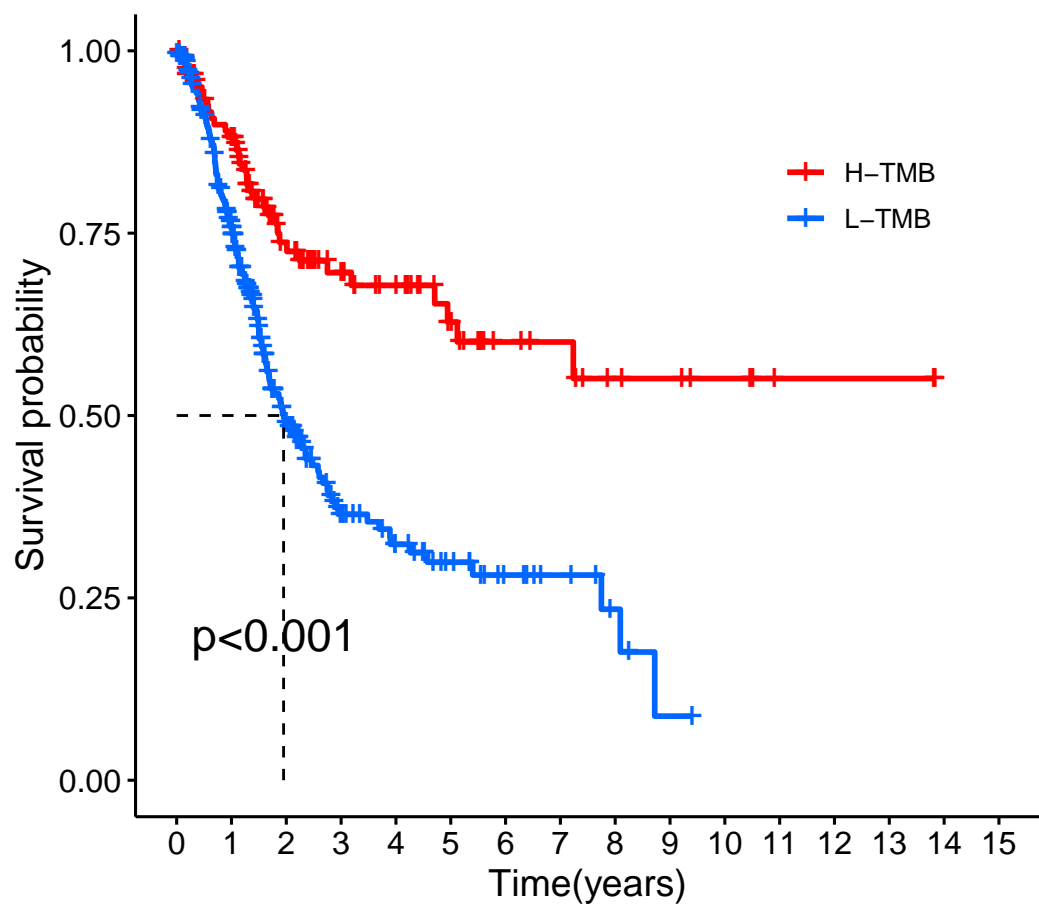

Supplement: Data_Sheet_1.zip [file Figure 8B.pdf › all raw data/Figures/Figure 8/Figure 8B.pdf]

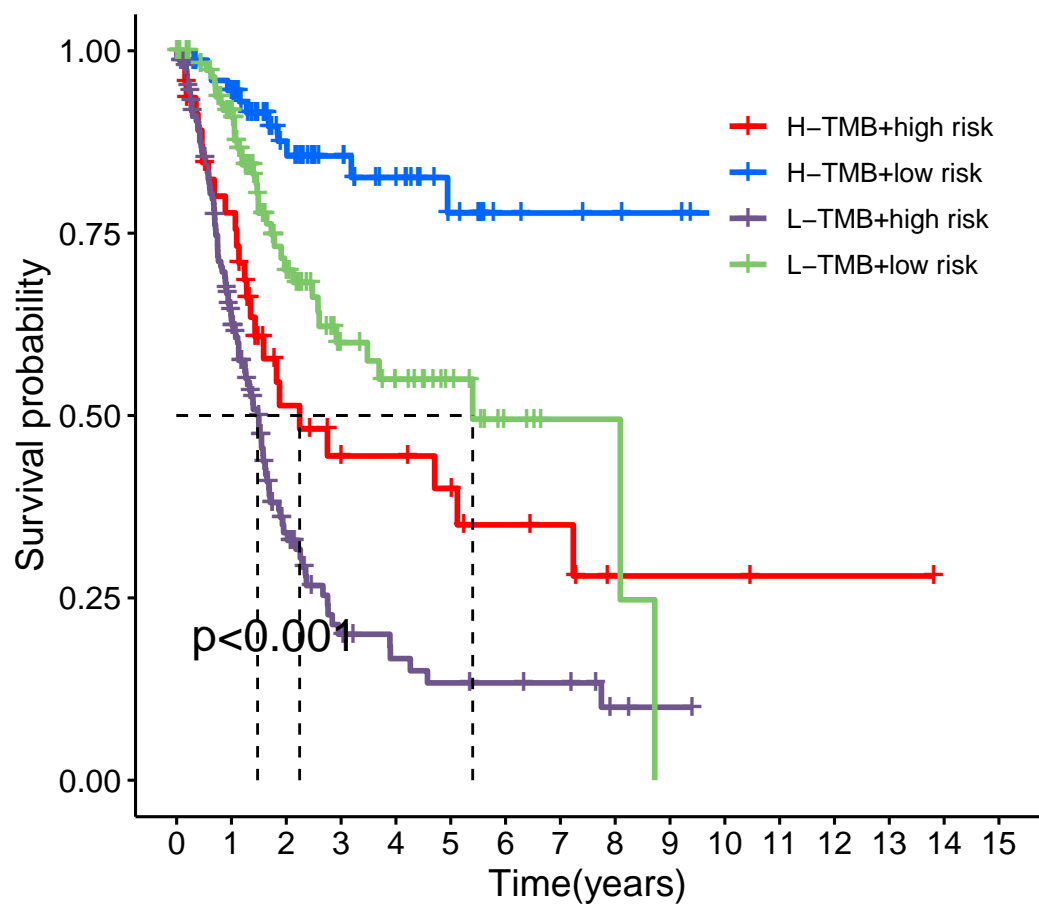

Supplement: Data_Sheet_1.zip [file Figure 8C.pdf › all raw data/Figures/Figure 8/Figure 8C.pdf]

|           | pvalue | Hazard ratio       |
|-----------|--------|--------------------|
| Age       | <0.001 | 1.034(1.018–1.050) |
| Gender    | 0.370  | 0.861(0.620–1.195) |
| Stage     | <0.001 | 1.759(1.450–2.134) |
| riskScore | <0.001 | 3.625(2.925–4.492) |

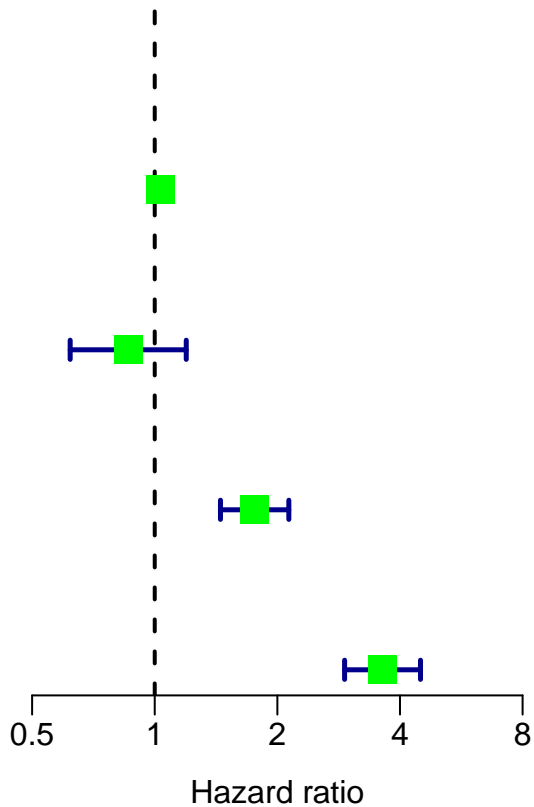

Supplement: Data_Sheet_1.zip [file Figure 9A.pdf › all raw data/Figures/Figure 9/Figure 9A.pdf]

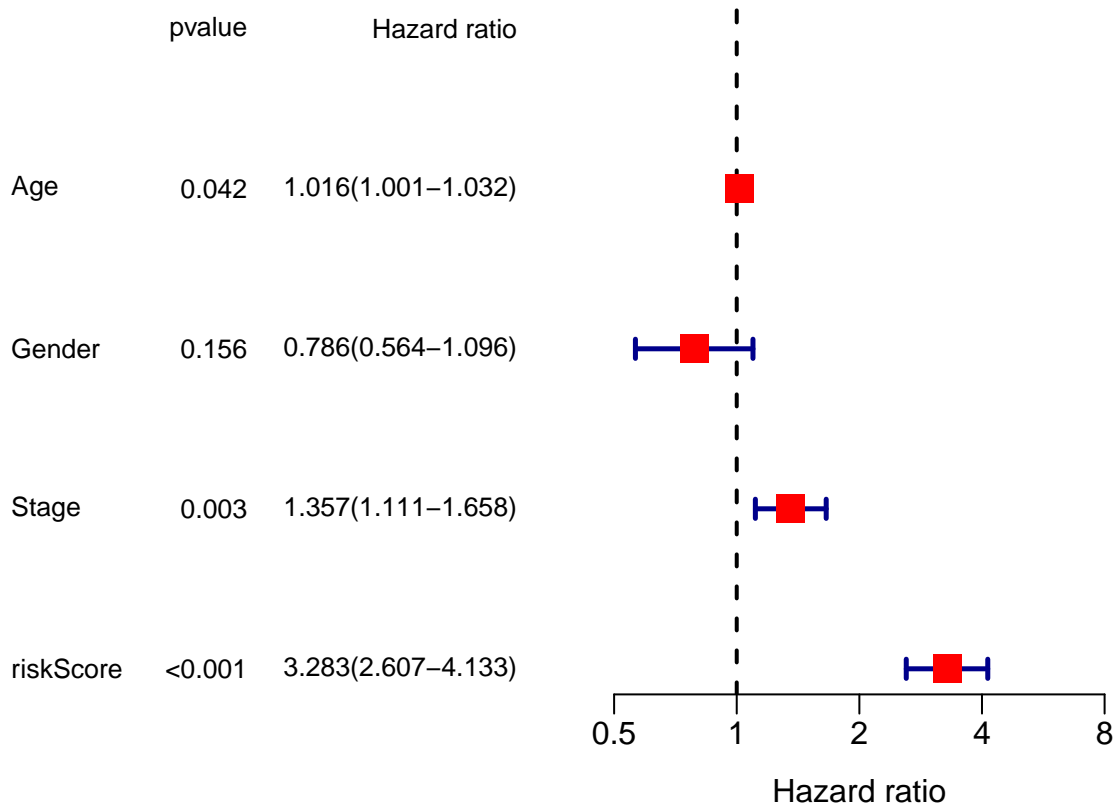

Supplement: Data_Sheet_1.zip [file Figure 9B.pdf › all raw data/Figures/Figure 9/Figure 9B.pdf]

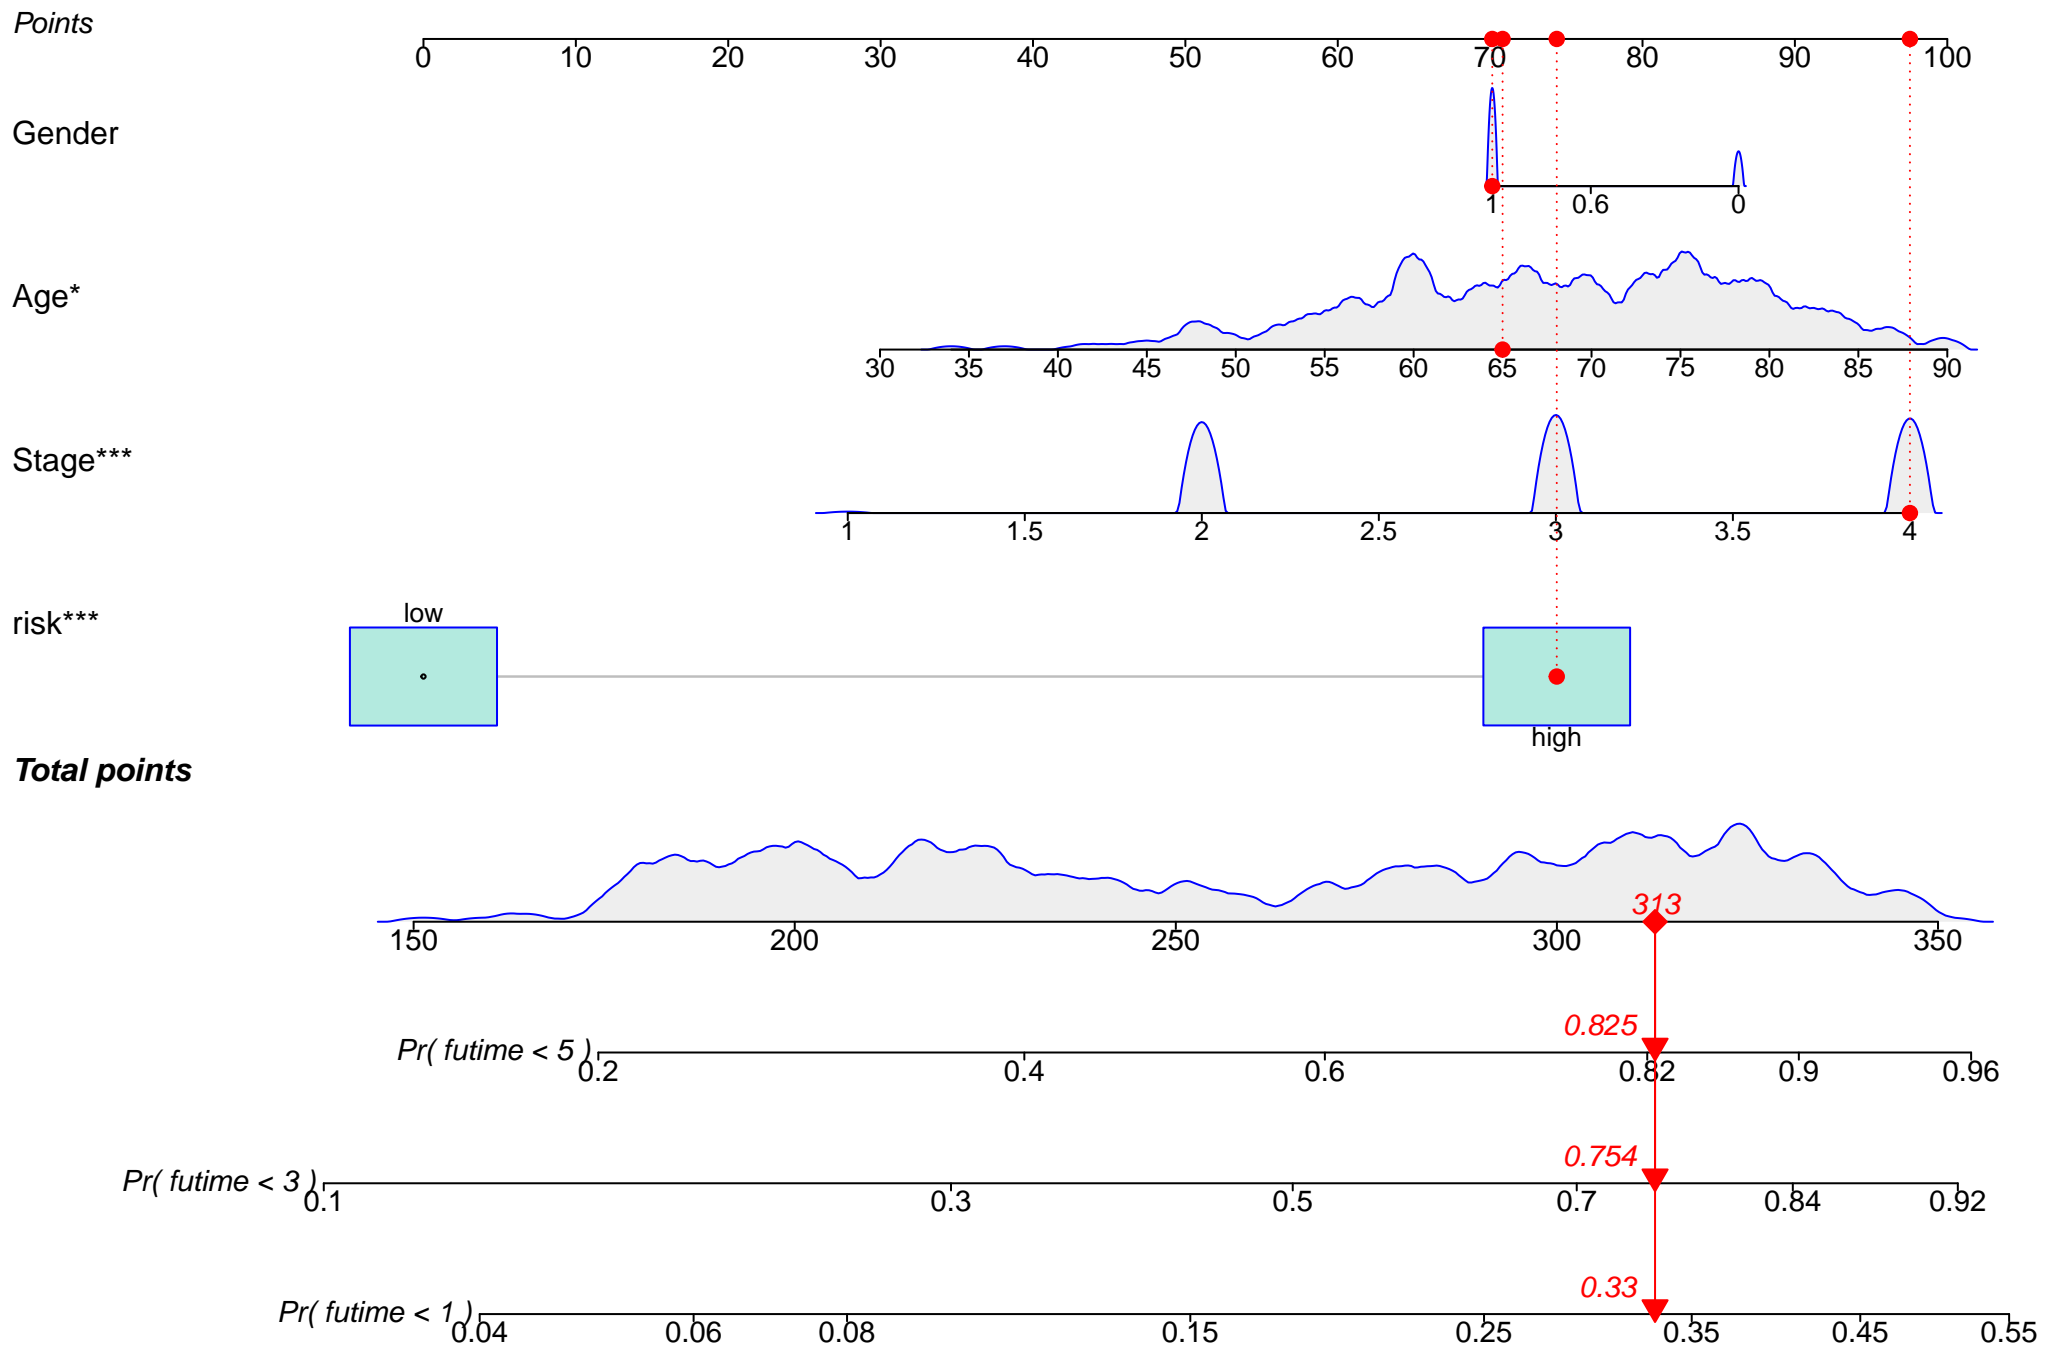

Supplement: Data_Sheet_1.zip [file Figure 9C.pdf › all raw data/Figures/Figure 9/Figure 9C.pdf]

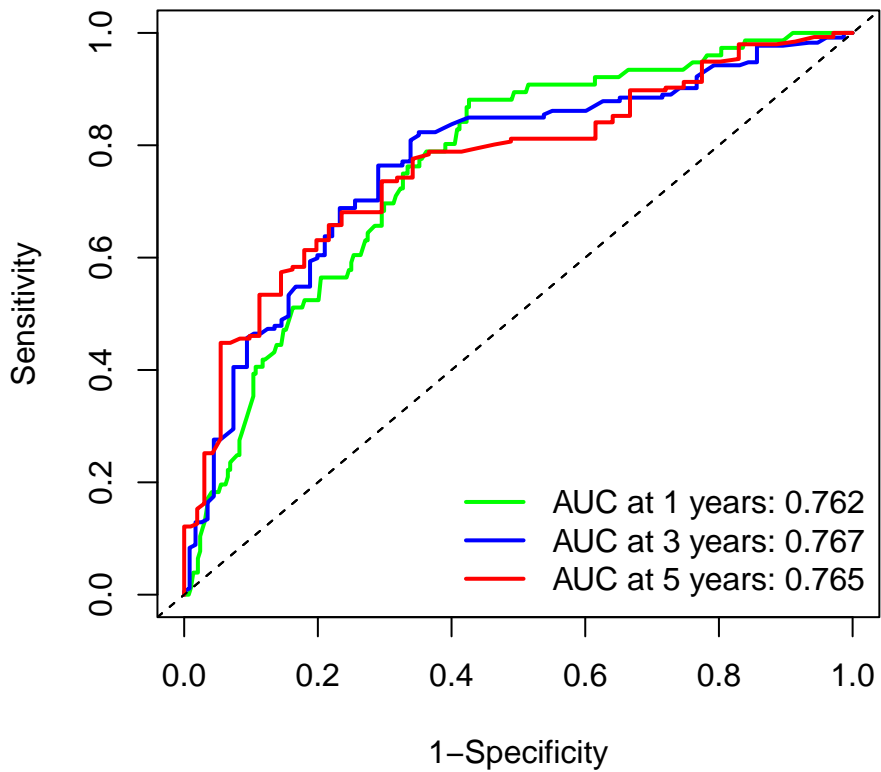

Supplement: Data_Sheet_1.zip [file Figure 9D.pdf › all raw data/Figures/Figure 9/Figure 9D.pdf]

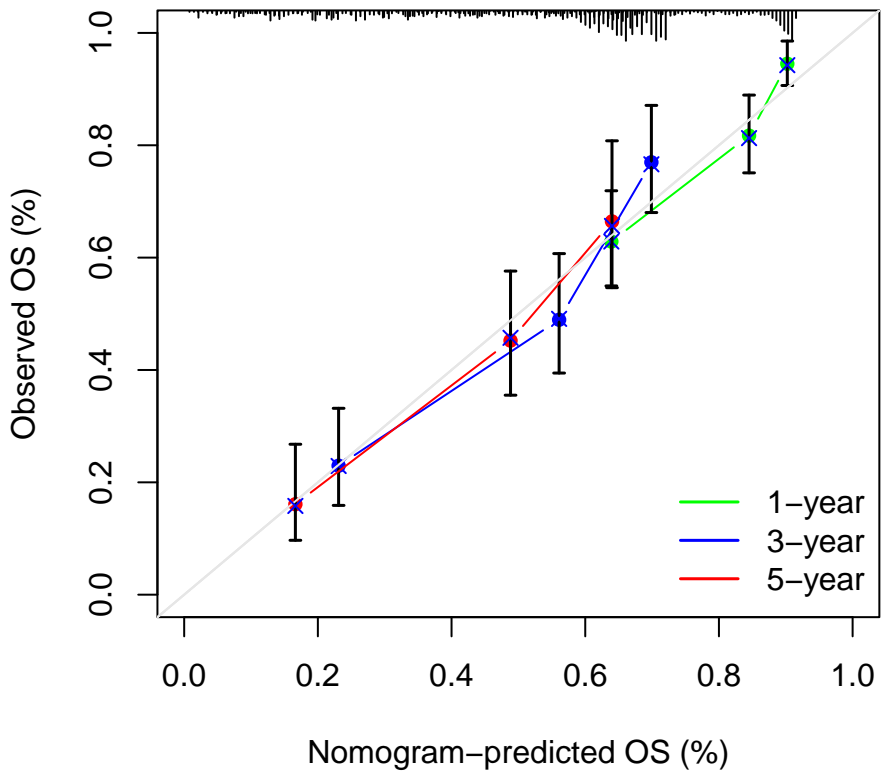

Supplement: Data_Sheet_1.zip [file Figure 9E.pdf › all raw data/Figures/Figure 9/Figure 9E.pdf]
